1    Untangling the Indonesian tangle net fishery: describing a data-poor fishery  
2    targeting large threatened rays (Order Batoidea)

3  
4

5    Brooke M. D'Alberto<sup>1,2\*</sup>, William T. White<sup>2,3</sup>, Andrew Chin<sup>1</sup>, Dharmadi<sup>4</sup>, Colin A. Simpfendorfer<sup>1</sup>

6  
7  
8

<sup>1</sup> Centre for Sustainable Tropical Fisheries and Aquaculture & College of Science and Engineering,  
James Cook University, Townsville, Queensland, Australia

9    <sup>2</sup> CSIRO Oceans and Atmosphere, Hobart, Tasmania, Australia.

10   <sup>3</sup> Australian National Fish Collection, CSIRO National Research Collections Australia, Hobart,  
11   Tasmania, Australia.

12   <sup>4</sup> Centre for Fisheries Research, Ancol-Jakarta, Indonesia

13

14   \*Corresponding author

15   Email: [brooke.dalberto@my.jcu.edu.au](mailto:brooke.dalberto@my.jcu.edu.au) (BMD)

16  
17  
18  
19  
20  
21  
22  
23  
24  
25  
26  
27  
28  
29  
30  
31  
32  
33  
34

## 35 Abstract

36 Shark-like batoids (Order Rhinopristiformes) are normally taken as incidental catch in fisheries  
37 targeting other species, one exception is a poorly understood Indonesian tangle net fishery. Market  
38 surveys of Muara Angke landing port recorded landed catch for this fishery. Recent catch data from  
39 Indonesian Capture Fisheries (2017 – 2018) were also examined to provide contemporary  
40 information. During the market surveys, 1,559 elasmobranchs were recorded, comprised of 24  
41 species of batoids and nine species of sharks. The most abundant were pink whipray *Pateobatis fai*  
42 and bottlenose wedgefish *Rhynchobatus australiae*, the latter being the main target species. Catch  
43 composition differed between individual tangle net boat landings, likely reflecting different fishing  
44 grounds, seasonal variation and potential localised declines in species over time. The fishery is highly  
45 selective for larger size classes, but smaller size classes of target species are also caught in high  
46 numbers in other Indonesian fisheries such as trawl, small mesh gillnet, and hand- and long- line  
47 fisheries. As of July 2018, the tangle net fishery was still operating, but few wedgefish were caught  
48 and the main landed catch was stingrays. Evidence of substantial and rapid declines in landings of  
49 wedgefish species, raises concerns about the status of shark-like batoids and stingrays in Indonesia.

50  
51 **Keywords:** South-East Asia, wedgefish, giant guitarfish, stingrays, lionggun net, conservation,  
52 threatened species

## 54 Introduction

55 Over the past three decades the declines of many chondrichthyan (sharks, rays, and chimaeras)  
56 populations have become a significant environmental concern [1-3]. The declines are a consequence  
57 of the rapid expansion of chondrichthyan take in fisheries [4], and globalisation of trade [5, 6].  
58 Chondrichthyans have intrinsically low biological productivity, as the result of their slow growth, late  
59 maturity, long generation times, and low fecundity, and therefore are slow to recovery from  
60 population declines [7]. Overfishing is the major threat to chondrichthyans, with one-quarter of  
61 shark and ray species threatened from target and non-target fisheries [8]. Population declines have  
62 been driven by the high prices of various shark and ray products on the global markets, particularly  
63 fins, but also demand for other products such as meat, gill plates, cartilage and skin for leather [6].  
64 The magnitude of the declines and the subsequent conservation issues has become a key focus for  
65 major international management conventions and agencies, such as Convention on International  
66 Trade in Endangered Species (CITES), Convention on the Conservation of Migratory Species of Wild  
67 Animals (CMS), the United Nations Food and Agriculture Organisation (FAO), and Regional Fisheries  
68 Management Organisations (RFMOs). To date, most of the scientific studies and conservation efforts

69 have focused on the decline of shark populations [9-11], and until recently, there has been little  
70 attention to the declines in ray populations despite them being among the most threatened groups  
71 of chondrichthyans [8].

72 The reported global chondrichthyan catch has been increasingly dominated by rays (Order  
73 Batoidea) [8]. Rays are mainly taken as bycatch in fishing gears such as trawls, pelagic and bottom  
74 long lines, purse seines, and gillnets, while there are few targeted fisheries [12]. The larger species of  
75 batoids have some of the lowest intrinsic rates of population increases [13-15], and like most  
76 chondrichthyans, cannot sustain high levels of fishing pressure before population collapse [16, 17].  
77 Shark-like batoids (Rhinopristiformes) include five families: Pristidae (sawfishes, 5 species), Rhinidae  
78 (wedgfishes, 10 species), Rhinobatidae (guitarfishes, 32 species), Glaucostegidae (giant guitarfishes,  
79 6 species) and Trygonorrhinidae (banjo rays, 8 species) [18, 19]. The vast majority of wedgfishes  
80 and giant guitarfishes are strongly associated with soft-bottom habitats in shallow (<100 m) tropical  
81 and temperate coastal waters, and play an important trophic role in soft sediment ecosystems [20-  
82 22]. This results in high exposure to intensive and expanding fisheries [23, 24]. These coastal habitats  
83 are under threat from anthropogenic influences, which is also a significant threat for these rays [25,  
84 26]. Globally these species have become an important component of fisheries landings as result of  
85 their high valued fins, which are considered amongst the most lucrative shark and ray product [4, 23,  
86 27, 28]. These batoids are extremely sensitive to overexploitation, with four of the families  
87 considered the most at risk of extinction of the chondrichthyans [8], and wedgfishes and giant  
88 guitarfishes have surpassed sawfishes being the most imperilled marine fish families globally [29].  
89 The most recent International Union for Conservation of Nature's (IUCN) Red List of Threatened  
90 Species assessments for wedgfishes and giant guitarfishes have found that all but one of the 16  
91 species have experienced an extremely high risk of extinction and are classified as Critically  
92 Endangered (CR) [29]. Only the eyebrow wedgfish, *Rhynchobatus palpebratus* was not assessed as  
93 CR, instead as Vulnerable (VU), due to it occurring primarily in Australia where there is low fishing  
94 pressure and some management measures in place [29]. Substantial declines and localised  
95 extinctions have already been reported for several batoid species [30] and there is limited  
96 information available on the species' interactions with fisheries and their life history, both of which  
97 limit development of effective management.

98 Indonesia is the world's largest contemporary elasmobranch fishing nation, accounting for ca.  
99 13% of the global elasmobranch catch [31]. It is the third largest exporter of shark fins in regards to  
100 quantity, with an average of 1235 tonne and sixth largest in value, worth an average of US\$10  
101 million per year [32]. In Indonesia, wedgfishes and giant guitarfishes are caught as bycatch in a  
102 variety of fisheries, but in addition are specifically targeted in the tangle net fishery, also referred to

103 as set bottom gillnets, shark/ray gillnets, and locally as “jaring liongbun” [=gillnet guitarfish] and  
104 “jaring cucut” [=gillnet shark]. This fishery uses hung, large diameter mesh (50 - 60cm) bottom-set  
105 gillnet, to specifically capture large rays. The high value fins of wedgefishes and giant guitarfishes is a  
106 particularly strong driver for this fishery, with the fins worth around 1.5 times more than those from  
107 other species [27], as well as leather products from stingrays, which have high market value and are  
108 increasing in demand [33, 34].

109 The Indonesian tangle net fishery began in the Aru Islands in the mid-1970s, and it rapidly  
110 expanded throughout the whole Indonesian archipelago [27]. In 1987, the Aru Island tangle net  
111 fishery peaked with 500 boats [35], and the rapid development of the fishery during this time was  
112 primarily driven by shark-fin exports [36, 37]. The trade of these fins was suspected to be the  
113 primary reason for the doubling of value of the Indonesian fin exports to Hong Kong in the 1980’s  
114 [36]. However, apparent declines in catch and increases of fishing effort, the number of tangle net  
115 boats fishing around the Aru Islands dropped to approximately 100 boats in 1996 [27]. Yet despite  
116 the decline in the number of boats and catch of the target species, the fins from wedgefish had such  
117 high value in the fin trade, the fishery was still considered economically viable and continued to  
118 operate, albeit with fewer vessels. The tangle net fishery also began operating from other ports in  
119 Indonesia, including Cirebon (West Java) from 1994 [38, 39] and the larger port Muara Angke  
120 (Jakarta) with the earliest records from 1991 [40]. In 2000, 100 gillnet vessels based in Cirebon were  
121 active [38]. In 2015, a total of 14 gill nets boats that fish in the Arafura Sea were reported to be  
122 active in Bitung, North Sulawesi [41]. In Muara Angke in 2004, 13 vessels were recorded to be  
123 operational in the tangle net industry, in waters around Borneo, Sulawesi and as far as West Papua.  
124 The number of boats operating from Muara Angke declined to 7 in 2005 [42]. There is no catch and  
125 size composition data available for this fishery, and the fishery as a whole is poorly defined and little  
126 understood. National fisheries landings data, including landings data for the tangle net fishery, are  
127 recorded as a single categories, such as “sharks” or “rays” with no species-specific details. There is  
128 strong anecdotal evidence of declines of wedgefish and giant guitarfish in some areas Indonesia as a  
129 result of this fishery [27, 35]. This raises concerns about the sustainability of the fishery and the  
130 population status of many of ray species caught.

131 To achieve sustainable use of these species, managers and conservation practitioners need to  
132 understand their population status, risk exposure, and resilience to fishing pressure and other  
133 threats. This requires data on fisheries catch composition, changes in relative abundance, and their  
134 interactions with fisheries. This information can then be used to inform the basis for the  
135 development of local and international management plans and conservation action for these  
136 threatened rays [43, 44]. The main aims of this paper are to (1) examine species, size and sex

137 composition of the landed catch of tangle net fishery and changes over time in abundance and  
138 species compositions, (2) and to discuss the results in terms of potential consequences for the  
139 fishery, conservation and management.

140

## 141 **Materials and Methods**

### 142 **Muara Angke market surveys: 2001 – 2005**

143 Elasmobranch catches from the tangle net fishery were recorded at the Muara Angke landing site  
144 (North Jakarta, Indonesia) and the adjacent village where post-landing processing of fish occurred  
145 between April 2001 and December 2005 (Fig. 1). Landing site surveys were conducted on 18  
146 occasions, and for each visit the landing site was surveyed for 1–4 consecutive days, resulting in a  
147 total 53 sampling days (SI Table 1). Informal interviews were conducted with the local fishers to  
148 enquire about the fate of the catch, prices and products of the fishery, and destinations of the  
149 various products.

150

151 **Figure 1.** The location of the Muara Angke landing port and processing village in Jakarta (star), and  
152 the location of Cirebon (diamond) and Benoa Harbour (triangle), Java Indonesia.

153

154 The number of each species landed from a tangle net boat was recorded. Due to the large  
155 number of landings and time constraints on each day surveyed, the number of specimens, biological  
156 data and measurements could not be taken from all sharks and rays present. Only specimens that  
157 could be accessed were surveyed, as randomised selection for sex/size was not possible. At the  
158 Muara Angke fishing port, catch composition could only be recorded for a brief period while the  
159 boats were being unloaded (Fig. 2a, b). As catches were unloaded over an ~2 hr period, the sharks  
160 and rays were placed into large hand-wheeled carts and taken to the adjacent village processing  
161 area, located less than a kilometre from the fishing port itself. Within the village processing area, the  
162 large sharks and rays from the tangle net fishery were typically taken to one of about 4 processing  
163 'houses' (Fig. 2 d). Species and size composition data was more readily collected during the  
164 unloading from the boat at the fishing port. Similar data could be obtained at the village processing  
165 area, often from the previous day's landings, but it was not possible to determine how many boats  
166 they originated from if more than one boat had landed in the previous two days. On days when  
167 catches were recorded in Muara Angke landing port, these catches were not examined again in the  
168 village processing area. Due to the relatively low number of landings observed per trip, this issue was  
169 rarely encountered (SI Table 1). In addition, landings from tangle net fishing boats operating in the

170 Banda and Arafura Seas which land at Benoa Harbour, Bali (Fig. 1), were also observed on one  
171 occasion. These catches arrived into the village processing area by freezer truck direct from Bali.  
172 Often individual tangle net boats would come into port once a month, and on three occasions it was  
173 possible to document the entire catch from these tangle net boats. These boats were recorded in  
174 Muara Angke landing port in July 2004, October 2004 and October 2005, and will be referred as Boat  
175 One, Boat Two and Boat Three, respectively. Boat Three included the catches of two boats which  
176 landed on the same day. However not all catch was examined for one of the boats, therefore the  
177 catches were combined and will be referred to as Boat Three.

178

179 **Figure 2.** Tangle net fishery catches at Muara Angke, Jakarta: (a) Large bottlenose wedgefish  
180 *Rhynchobatus australiae* unloaded from tangle net boats at the port; (b) Large stingrays being  
181 processed at the adjacent village processing area; (c) Drying ray skins which will be used to make  
182 stingray leather products such as wallets and belts; (d) Wedgefish landings from Arafura Sea at the  
183 village processing area – *Rhynchobatus australiae* in centre of image highlighting the line of three  
184 white spots (yellow circle) diagnostic in this species.

185

186 Catch composition of elasmobranchs from other fisheries were also recorded during the Muara  
187 Angke surveys to allow for a comparison of the size composition of species between the tangle net  
188 fishery and the other fisheries exploiting the same species. This included landings from small-mesh  
189 gillnet (<20 cm mesh size) fisheries, Java Sea and Arafura Sea trawl fisheries, southern Java trammel  
190 net fishery, and various hand- and long-line fisheries, which were operating out of the landing sites  
191 surveyed (see [12]). Similar to the tangle net fishery landings, only landed catch that could be  
192 accessed when a boat was unloading could be surveyed and randomised selection was not possible.

193

## 194 **Biological data**

195 When possible, the disc width (DW) for the Dasyatidae, Myliobatidae, Aetobatidae, Gymnuridae  
196 and Rhinopterae, and total length (from the tip of the snout to the tip of the upper lobe of the  
197 caudal fin; TL) for the sharks and shark-like batoids (Pristidae, Glaucostegidae and Rhinidae) were  
198 measured to the nearest 1 mm, and sex recorded. As the shark-like batoids were typically landed  
199 without fins, an estimated TL was recorded when animals were landed without fins. Removal of fins  
200 from these rays occasionally occurred following the landing, and after the weighing of specimens.  
201 Total weight (TW) of whole individuals (fins attached and not gutted) was recorded to the nearest g  
202 or kg (depending on the size of the individual), however, the vast majority of batoids and sharks  
203 could not be weighed at the landing site. When large numbers of similar sized individuals were

204 observed, measurements were taken from a sub-set of whole individuals that could be accessed,  
205 and used to estimate DW, TL and TW for the remaining individuals not measured. For the individuals  
206 where the lengths were measured but not weighed, the weight of each individual was calculated  
207 using the equation for the relationship between length and whole weight for the species (SI Table 2).  
208 For species where a length-weight equation was not available, the estimated weight was calculated  
209 using the equation from a morphologically similar species (SI Table 1). In instances when the size of  
210 individuals for a particular species were not recorded, the weight was estimated using the average  
211 weight of the individuals for that species. Total weight was then determined for each species landed  
212 in the fishery. Details on the reproductive biology of each species recorded were reported in [12]

213

## 214 **Species identification**

215 Species were identified using the keys in [45] and [46], with nomenclature updated using [47] and  
216 [48]. The identity of a subsample of *Rhynchobatus* species caught in the tangle net fishery was also  
217 further verified by genetic analysis (see [49]) and from images using recently determined colour  
218 pattern differences between species [47]. The key colour pattern difference used to differentiate *R.*  
219 *australiae* from its closest regional congeners was the pattern of white spots around the dark  
220 pectoral spot present in all but the largest individuals. In *R. australiae*, there is a line of 3 white spots  
221 located adjacent to the black pectoral spot, or its usual position if faded [47]. In two large pregnant  
222 females which possessed no white spots or black pectoral spots, due mainly to their poor condition,  
223 the typical *R. australiae* spot pattern was evident in late-term embryos allowing for confirmation of  
224 their identity. The stingrays, *Maculabatis gerrardi* and *Maculabatis macrura* have overlapping  
225 distributions and differ in mostly subtle morphological characteristics [47], thus without genetic  
226 identification, the two species cannot be readily differentiated. Furthermore, since *M. macrura* was  
227 only recently recognised as valid and distinct from *M. gerrardi* [47], our data could not be  
228 retrospectively confirmed as either or both species. Although these records could constitute either  
229 species, herein we refer to these species as the prevailing name used for the whitespotted species in  
230 Indonesia, *M. gerrardi*.

231

## 232 **Data analysis**

233 Species composition of the landings was expressed as percentage of the total number of  
234 individuals by the recorded number and mass for each species at the landing site and processing  
235 village. Minimum, maximum and mean  $\pm$  standard error (S.E.) for DW, TL and TW are reported for  
236 each species. Size frequency histograms for the most abundant species were produced. Data for the  
237 three individual tangle nets was grouped to demonstrate overall landed species composition, and to

238 the variation of species composition between individual boats, data from Boat One and Boat Two  
239 were displayed to examine differences in catches between vessels..

240

## 241 **Contemporary tangle net fishery: 2005 – 2014 & 2017 - 2018**

242 Total *Rhynchobatus* spp. landings in tonnes across all Indonesian fisheries between 2005 – 2014  
243 was obtained from the Indonesian Capture Fisheries department (Dharmadi pers. data). Information  
244 on how the data was collected was not available. Muara Angke landing survey data was obtained  
245 (Dharmadi pers. data) from the Indonesian Capture Fisheries department, from 2<sup>nd</sup> January 2017 –  
246 16<sup>th</sup> July 2018. The date of arrival into the landing port, vessel, owner, fishing gear, total number of  
247 animals caught, and the main three species and landed catch caught per species in kilograms (kg)  
248 was recorded for each boat.

249

## 250 **Ethics Statement**

251 All marine life examined in this study were landed from fisheries in Indonesia and were already  
252 dead upon inspection. Permission to undertake surveys in Indonesia was granted by the Research  
253 Centre for Fisheries Management and Conservation in Jakarta as part of collaborative projects  
254 funded by the Australian Centre for International Agricultural Research (project codes FIS/2000/062  
255 and FIS/2003/037). No other authorisation or ethics board approval was required to conduct the  
256 study.

257

## 258 **Results**

### 259 **Muara Angke market surveys: 2001-2005**

#### 260 **Species and size composition of the fishery**

261 Across 18 sampling trips, totalling 53 survey days, the tangle net boats were recorded in Muara  
262 Angke landing port 8 times, and 7 times within the village processing area. A total of 1,551  
263 elasmobranchs were recorded from tangle net fishery landings at Muara Angke during port surveys  
264 between April 2001 and December 2005. This comprised 1,526 batoids (98.3% of the catch)  
265 comprising 24 species from seven families (Table 1). The most abundant family was the Dasyatidae,  
266 contributing 72.5% to the total number of elasmobranchs recorded, followed by the family Rhinidae,  
267 comprising 20.8% of total observed catch. Only 25 sharks were recorded, with nine shark species  
268 from four families (Table 1). As not all individuals could be counted when landed, and in many cases  
269 the numbers were estimated, the numbers presented thus represents an underestimation of the



270 total number of individuals caught in this fishery during the survey period. Of the 33 shark and ray  
271 species recorded in this fishery during the surveys, 24 species (80%) are listed as threatened  
272 (Critically Endangered, Endangered, or Vulnerable) in the IUCN Red List of Threatened Species (Table  
273 1).

274

### 275 **Family Pristidae**

276 Two largetooth sawfish *Pristis pristis* caught in the Arafura/Banda Sea region were recorded from  
277 the Benoa Harbour landings in August 2002 (Table 2; Fig. 1). Both individuals were adult males and  
278 both ca. 420 cm TL and estimated total landed weight of 220 kg (Table 2).

279

### 280 **Family Glaucostegidae**

281 Two species of giant guitarfish were recorded in Muara Angke landing port: the clubnose guitarfish  
282 *Glaucostegus thouin* and giant guitarfish *Glaucostegus typus*. The presence of *G. thouin* in the fishery  
283 was recorded once in April 2001 (Table 2). However due to the logistics of accessing these rays upon  
284 unloading from the boat and the rotten state of the specimens, the estimates of numbers or size  
285 was not possible for *G. thouin*. Yet, *G. thouin* individuals were present in a number of images taken  
286 during surveys, so it is likely to be a regular catch in this fishery. Fourteen *G. typus* were recorded on  
287 three occasions (Table 2), however only a subset of specimens were able to be measured. Seven  
288 were females, six males and one not sexed, with an estimated total landed weight of 386 kg (Table  
289 1).

290

### 291 **Family Rhinidae**

292 Three species of wedgefish were recorded from Muara Angke landing port: the bowmouth  
293 guitarfish *Rhina ancylostoma*, the bottlenose wedgefish *Rhynchobatus australiae*, and the eyebrow  
294 wedgefish *Rhynchobatus palpebratus*. *Rhina ancylostoma* was recorded on 7 occasions over the  
295 sampling period (Table 2). The landed catch of *R. ancylostoma* comprised 15 females, 10 males, and  
296 32 specimens counted but not sexed, with an estimated total landed weight of 4.4 tonnes (Table 1).  
297 Females ranged from 139–250 cm TL and 22.9–133.6 kg, and males ranged from 130–260 cm TL and  
298 18.7–150.3 kg, and only one unsexed was measured at 270 cm TL and 168 kg. *Rhynchobatus*  
299 *australiae* comprised the largest component of wedgefishes in the Indonesia tangle net fishery and  
300 the second most abundant species recorded (Table 1). It was recorded on 8 occasions (Table 2) and a  
301 total of 238 individuals with an estimated total landed weight of 24 tonnes, comprising 99 females,  
302 18 males and 121 unsexed individuals. A subset of 29 individuals were measured, the majority of  
303 which were females approximately 300 cm TL (Fig. 3a). On one occasion, approximately 7.1 tonnes

304 **Table 1.** Species composition, number of individuals of a species observed (no.) and overall percentage (% by no.) of the catch for the elasmobranchs caught  
305 by the tangle net fishery, and landed in Muara Angke landing port, Jakarta Indonesia in April 2001 – December 2005. The reported maximum size (Reported  
306 Max. size) and observed minimum (Min.), observed maximum size (Max.), and observed mean ( $\pm$  S.E.) size (DW/TL cm) and minimum estimated total weight  
307 (kg) are reported for each species, with the International Union for Conservation of Nature's (IUCN) Red List of Threatened Species status (as of May 2019).  
308 IUCN categories are CR, Critically Endangered; EN, Endangered; VU, Vulnerable; LC, Least Concern; DD, Data Deficient. Dashed lines indicate species  
309 presence was recorded in landings, but data was not able to be documented.

| Family                      | Scientific name                 | Common name            | IUCN Listing | Year Assessed | Reported Max. size | No.   | % by No. | Min. size | Max. size | Mean Size | $\pm$ S.E. | Min. weight | Max. weight | Mean Weight | $\pm$ S.E. |
|-----------------------------|---------------------------------|------------------------|--------------|---------------|--------------------|-------|----------|-----------|-----------|-----------|------------|-------------|-------------|-------------|------------|
| Pristidae                   | <i>Pristis pristis</i>          | Largetooth sawfish     | CR           | 2013          | 656.0              | 2     | 0.128    | --        | 420.0     | 420.0     | --         | --          | 220.3       | 220.3       | --         |
| Glaucostegidae              | <i>Glaucostegus thouin</i>      | Clubnose guitarfish    | CR*          | 2019          | 250.0              | --    | --       | --        | --        | --        | --         | --          | --          | --          | --         |
|                             | <i>Glaucostegus typus</i>       | Giant sholvenose ray   | CR*          | 2019          | 270.0              | 14    | 0.898    | 170.0     | 260.0     | 206.0     | 13.15      | 14.86       | 51.36       | 27.57       | 5.543      |
| Rhinidae                    | <i>Rhina ancylostoma</i>        | Bowmouth guitarfish    | CR*          | 2019          | 270.0              | 57    | 3.656    | 130.1     | 270.0     | 190.2     | 22.97      | 18.68       | 168.4       | 77.38       | 24.29      |
|                             | <i>Rhynchobatus australiae</i>  | Bottlenose wedgefish   | CR*          | 2019          | 300.0              | 238   | 15.27    | 190.0     | 300.0     | 282.1     | 4.662      | 30.21       | 118.7       | 100.9       | 4.181      |
|                             | <i>Rhynchobatus palpebratus</i> | Eyebrow wedgefish      | VU*          | 2019          | 262.0              | 30    | 1.924    | --        | --        | --        | --         | --          | --          | --          | --         |
| Dasyatidae                  | <i>Bathytoshia lata</i>         | Brown stingray         | LC           | 2007          | 260.0              | 1     | 0.064    | --        | 202.0     | 202.0     | --         | --          | --          | 300.0       | --         |
|                             | <i>Himantura leoparda</i>       | Leopard whipray        | VU           | 2015          | 140.0              | 31    | 1.988    | 83.20     | 120.0     | 98.72     | 3.016      | 14.37       | 39.45       | 23.61       | 2.061      |
|                             | <i>Himantura uarnak</i>         | Coach whipray          | VU           | 2015          | 160.0              | 57    | 3.656    | 42.60     | 147.6     | 99.50     | 6.204      | 4.015       | 69.83       | 28.57       | 4.189      |
|                             | <i>Himantura undulata</i>       | Honeycomb whipray      | VU           | 2011          | 130.0              | 1     | 0.064    | --        | 112.8     | 112.8     | --         | 33.27       | --          | 33.27       | --         |
|                             | <i>Maculabatis astra</i>        | Blackspotted whipray   | LC           | 2015          | 80.0               | 4     | 0.257    | --        | 79.00     | 79.00     | --         | 13.26       | --          | 13.26       | --         |
|                             | <i>Maculabatis gerrardi</i>     | Whitespotted whipray   | VU           | 2004          | 116.0              | 194   | 12.44    | 62.70     | 89.50     | 75.85     | 1.036      | 6.560       | 19.40       | 12.01       | 2.410      |
|                             | <i>Megatrygon microps</i>       | Smalleye stingray      | DD           | 2015          | 222.0              | 1     | 0.064    | --        | 174.8     | 174.8     | --         | 111.3       | --          | 111.3       | --         |
|                             | <i>Pastinachus ater</i>         | Broad cowtail ray      | LC           | 2015          | 200.0              | 199   | 12.76    | 86.00     | 149.0     | 114.3     | 2.618      | 15.74       | 71.67       | 37.98       | 2.332      |
|                             | <i>Pateobatis fai</i>           | Pink whipray           | VU           | 2015          | 146.0              | 264   | 16.93    | 70.50     | 168.4     | 110.9     | 4.595      | 9.101       | 100.4       | 36.45       | 4.143      |
|                             | <i>Pateobatis jenkinsii</i>     | Jenkin's whipray       | VU           | 2015          | 150.0              | 187   | 11.99    | 59.20     | 138.4     | 82.59     | 1.791      | 5.621       | 58.47       | 14.78       | 1.207      |
|                             | <i>Pateobatis uarnacoides</i>   | Whitenose whipray      | VU           | 2004          | 119.0              | 125   | 8.018    | 51.70     | 118.8     | 91.23     | 4.206      | 3.869       | 38.38       | 20.42       | 2.390      |
|                             | <i>Taeniurops meyeri</i>        | Blotched stingray      | VU           | 2015          | 180.0              | 51    | 3.271    | 62.80     | 164.0     | 116.8     | 5.332      | 6.615       | 93.37       | 40.25       | 4.713      |
|                             | <i>Urogymnus asperrimus</i>     | Porcupine ray          | VU           | 2015          | 115.0              | 5     | 0.321    | 76.50     | 103.4     | 89.95     | 9.511      | 11.40       | 26.17       | 18.78       | 5.222      |
| <i>Urogymnus granulatus</i> | Mangrove whipray                | VU                     | 2015         | 141.0         | 10                 | 0.641 | 97.20    | 141.0     | 118.8     | 6.300     | 22.07      | 61.55       | 39.72       | 5.728       |            |
| Gymnuridae                  | <i>Gymnura zonura</i>           | Zonetail butterfly ray | VU           | 2006          | 108.0              | 7     | 0.449    | 70.50     | 91.60     | 79.78     | 3.036      | 2.442       | 5.466       | 3.657       | 0.4433     |

|                    |                                 |                            |                        |      |       |       |       |       |       |       |        |       |       |       |        |
|--------------------|---------------------------------|----------------------------|------------------------|------|-------|-------|-------|-------|-------|-------|--------|-------|-------|-------|--------|
| Aetobatidae        | <i>Aetobatus ocellatus</i>      | Spotted eagle ray          | VU                     | 2015 | 330.0 | 45    | 2.886 | 108.9 | 214.4 | 138.6 | 3.994  | 19.37 | 135.4 | 41.43 | 4.151  |
| Myliobatidae       | <i>Aetomylaeus vespertilio</i>  | Oranate eagle ray          | EN                     | 2015 | 300.0 | 11    | 0.706 | 146.2 | 240.0 | 187.5 | 17.157 | 45.11 | 187.1 | 100.6 | 26.66  |
| Carcharhinidae     | <i>Carcharhinus amboinensis</i> | Pigeye shark               | DD                     | 2005 | 248.0 | --    | --    | --    | --    | --    | --     | --    | --    | --    | --     |
|                    | <i>Carcharhinus obscurus</i>    | Dusky shark                | VU                     | 2007 | 360.0 | 2     | 0.128 | --    | --    | --    | --     | --    | --    | --    | --     |
|                    | <i>Carcharhinus leucas</i>      | Bull shark                 | NT                     | 2005 | 340.0 | 2     | 0.128 | --    | --    | --    | --     | --    | --    | --    | --     |
|                    | <i>Carcharhinus limbatus</i>    | Common blacktip shark      | NT                     | 2005 | 193.0 | 6     | 0.385 | --    | --    | --    | --     | --    | --    | --    | --     |
|                    | <i>Galeocerdo cuvier</i>        | Tiger shark                | NT                     | 2005 | 550.0 | 4     | 0.257 | --    | --    | --    | --     | --    | --    | --    | --     |
| Ginglymostomatidae | <i>Nebrius ferrugineus</i>      | Tawny nurse shark          | VU                     | 2003 | 320.0 | 3     | 0.192 | --    | --    | --    | --     | --    | --    | --    | --     |
| Hemigaleidae       | <i>Hemipristis elongata</i>     | Fossil shark               | VU                     | 2015 | 240.0 | 3     | 0.192 | 109.6 | 122.9 | 116.3 | 4.702  | 5.719 | 25.14 | 6.989 | 0.8984 |
|                    |                                 | Scalloped hammerhead shark | EN                     | 2007 | 346.0 | 3     | 0.192 | --    | 175.4 | 175.4 | --     | --    | --    | 25.14 | --     |
| Sphyrnidae         | <i>Sphyrna lewini</i>           | Great hammerhead shark     | EN                     | 2007 | 610.0 | 2     | 0.128 | --    | --    | --    | --     | --    | --    | --    | --     |
|                    |                                 | <i>Sphyrna mokarran</i>    | Great hammerhead shark | EN   | 2007  | 610.0 | 2     | 0.128 | --    | --    | --     | --    | --    | --    | --     |

\* The newest IUCN Red List assessments of these rays have been accepted but have not been published on the IUCN Red List website. Status information is available from [\[29\]](#)

310

311

312

313

314

315

316

317

318

319

320



|              |                                         |           |          |          |           |          |           |          |          |          |          |           |          |          |           |          |          |          |          |          |           |          |
|--------------|-----------------------------------------|-----------|----------|----------|-----------|----------|-----------|----------|----------|----------|----------|-----------|----------|----------|-----------|----------|----------|----------|----------|----------|-----------|----------|
| Hemigaleidae | <i>Hemipristis elongatus</i>            | --        | --       | --       | --        | --       | --        | --       | --       | --       | --       | --        | --       | Y        | --        | --       | --       | --       | --       | --       | Y         |          |
| Sphyrnidae   | <i>Sphyrna lewini</i>                   | Y         | --       | --       | --        | --       | --        | --       | --       | --       | Y        | --        | --       | Y        | --        | --       | --       | --       | --       | --       | --        |          |
|              | <i>Sphyrna mokarran</i>                 | Y         | --       | --       | --        | --       | --        | --       | --       | --       | Y        | --        | --       | Y        | --        | --       | --       | --       | --       | --       | --        |          |
|              | Number of ray species                   | 18        | 0        | 0        | 10        | 0        | 14        | 9        | 0        | 9        | 0        | 16        | 0        | 0        | 13        | 0        | 0        | 0        | 0        | 8        | 14        | 1        |
|              | Number of shark species                 | 5         | 0        | 0        | 0         | 0        | 3         | 0        | 0        | 0        | 0        | 4         | 0        | 0        | 4         | 0        | 0        | 0        | 0        | 0        | 5         | 1        |
|              | <b>Total number of species observed</b> | <b>23</b> | <b>0</b> | <b>0</b> | <b>10</b> | <b>0</b> | <b>17</b> | <b>9</b> | <b>0</b> | <b>9</b> | <b>0</b> | <b>20</b> | <b>0</b> | <b>0</b> | <b>17</b> | <b>0</b> | <b>0</b> | <b>0</b> | <b>0</b> | <b>8</b> | <b>19</b> | <b>2</b> |

324 of *R. australiae* was landed from a single tangle net boat on the 14<sup>th</sup> August 2002. A total of 16  
325 *Rhynchobatus* landed in the tangle net fishery had their identifications confirmed by genetic analysis  
326 (see [49]). Of these 16, two were from landings at Muara Angke and the remaining 14 from the  
327 Benoa Harbour landings. The 14 Benoa Harbour individuals consisted of five *R. palpebratus*  
328 (reported as *R. palpebratus*/*R. cf laevis* in [49]) and nine *R. australiae*. The known distribution of *R.*  
329 *palpebratus* is northern Australia and New Guinea and thus was not surprising for it to be observe in  
330 landings from the Arafura Sea region. The ratio of *R. palpebratus* to *R. australiae* determined from  
331 the genetic analysis (45:6%) was used to estimate the species composition of the 100 *Rhynchobatus*  
332 individuals recorded in the Benoa Harbour landings on the 14<sup>th</sup> August 2002 (SI Table 1).  
333 *Rhynchobatus palpebratus* was recorded on one occasion, with a total of 30 individuals but not  
334 sexed, measured or weighed (Table 1).

335

336 **Figure 3.** Size-frequency histograms of the most abundant ray species (represented by 10 or more  
337 measured individuals) in the tangle net catches: (a) *Rhynchobatus australiae*; (b) *Himantura*  
338 *leoparda*; (c) *Himantura uarnak*; (d) *Maculabatis gerrardi*; (e) *Pastinachus ater*; (f) *Pateobatis fai*. In  
339 this Figure and Figure 4, the species are placed in phylogenetic order from wedgefish through to  
340 eagle rays; white bars denote females, grey bars males and black bars unsexed individuals; the total  
341 number (n) of individuals, known size at birth (red line) and known size at maturity (M, male; F,  
342 female) when known; the size scale bar (x-axis) extends to the maximum known size for each of the  
343 species.

344

### 345 **Family Dasyatidae**

346 Stingrays were present in every tangle net catch landed in Muara Angke (Table 2). A total of 1130  
347 stingrays, with an estimated mass of 30.2 tonnes, were recorded comprising 13 species from 8  
348 genera (Table 1). The most abundant stingray species were the pink whipray *Pateobatis fai* (9.6  
349 tonnes; Fig. 3f), broad cowtail ray *Pastinachus ater* (7.5 tonnes; Fig. 3e), whitespotted whipray  
350 *Maculabatis gerrardi* (2.3 tonnes; Fig. 3d), Jenkin's whipray *Pateobatis jenkinsii* (2.7 tonnes; Fig. 4a),  
351 and the whitenose whipray *Pateobatis uarnacoides* (2.5 tonnes; Fig. 4b). Other species that were  
352 recorded were brown stingray *Bathytoshia lata*, leopard whipray *Himantura leoparda* (Fig. 3b),  
353 coach whipray *Himantura uarnak* (Fig. 3c), honeycomb whipray *Himantura undulata*, blackspotted  
354 whipray *Maculabatis astra*, smalleye stingray *Megatrygon microps*, blotched stingray *Taeniurops*  
355 *meyeni* (Fig. 4c) and porcupine ray *Urogymnus asperrimus*. *Maculabatis astra* was only recorded  
356 from the single Benoa Harbour landing, this species is only present in the far eastern portion of  
357 Indonesia off West Papua and is allopatric from *M. gerrardi* [47]. As a result, this species is a good

358 indicator species if a particular tangle net fishing catch was suspected of coming from the Arafura  
359 Sea region. Specimens from *H. leoparda*, *H. uarnak*, *P. fai*, *P. uarnacoides* and *T. meyeri* specimens  
360 were close to the known maximum size (Fig. 3,4). The majority of the specimens caught for each  
361 species were near or at a larger size than their known size at maturity (Fig. 3,4; SI Table 3).

362

363 **Figure 4.** Size-frequency histograms of the most abundant ray species (represented by 10 or more  
364 measured individuals) in the tangle net catches: (a) *Pateobatis jenkinsii*; (b) *Pateobatis uarnacoides*;  
365 (c) *Taeniurops meyeri*; (d) *Aetobatus ocellatus*. In this Figure and Figure 4, the species are placed in  
366 phylogenetic order from wedgefish through to eagle rays; white bars denote females, grey bars  
367 males and black bars unsexed individuals; the total number (n) of individuals, known size at birth  
368 (red line) and known size at maturity (M, male; F, female) when known; the size scale bar (x-axis)  
369 extends to the maximum known size for each of the species.

370

### 371 **Family Aetobatidae**

372 One species of eagle ray, spotted eagle ray *Aetobatus ocellatus*, was recorded in the tangle net  
373 fishery on 8 occasions (Table 2). A total of 45 individuals were observed, with an estimated total  
374 landed weight of 1.8 tonnes (Table 1). This comprised of 21 females, 22 males, and 2 unsexed  
375 specimens (Fig. 4d). *Aetobatus ocellatus* specimens were mainly caught close to or at a greater size  
376 than the known size at maturity (Fig. 4d; SI Table 3).

377

### 378 **Other families**

379 Similarly, only one species of Myliobatidae was recorded, the ornate eagle ray *Aetomylaeus*  
380 *vespertilio*, with an estimated landed catch of 1.1 tonnes, of which 5 were females, 1 male, and 5  
381 unsexed individuals (Table 1). The specimens of this species recorded were all large, including one  
382 160 kg female. They were recorded occasionally and comprised a small proportion of the total  
383 landed catch during 2001–2005 (Table 2). A single Gymnuridae species was recorded, the zonetail  
384 butterfly ray *Gymnura zonura* (Table 1). Sharks were a minor part of the tangle net catch in the  
385 Muara Angke surveys and rarely observed (Table 2). All of the shark species represented less than  
386 1% of the total catch (Table 1). Carcharhinid sharks that were present in the fishery in small numbers  
387 were the pigeye shark *Carcharhinus amboinensis*, dusky shark *Carcharhinus obscurus* (n = 2), bull  
388 shark *Carcharhinus leucas* (n = 2), common blacktip shark *Carcharhinus limbatus* (n = 6) and tiger  
389 shark *Galeocerdo cuvier* (n = 4). In addition, other sharks recorded from the fishery were the tawny  
390 nurse shark *Nebrius ferrugineus* (n = 3) on one occasion, fossil shark *Hemipristis elongata* (n = 4) on

391 two occasions, scalloped hammerhead *Sphyrna lewini* (n = 3) on 3 occasions, and great hammerhead  
392 *Sphyrna mokarran* (n = 3) on 3 occasions (Table 1; Table 2).

393

### 394 **Variation in species composition between individual tangle net boats**

395 For the three tangle net boats of which the entire landed catch was document, the most  
396 abundant species was *M. gerrardi*, followed by *R. australiae*, *P. ater*, *R. ancylostoma*, *A. ocellatus*, *H.*  
397 *uarnak*, and *P. jenkinsii* (Fig. 5). Eighteen other species of elasmobranchs, comprising 10 ray species  
398 and 8 shark species, were also recorded but in low numbers. All three boats fished in waters around  
399 Kalimantan, however the species composition varied considerably between the individual boats (Fig.  
400 6). Boat One reported fishing in waters around West Sumatra, to Riau Islands and Kalimantan, and in  
401 less than 100 meters of water (Fig. 1). From Boat One, 138 large rays representing 13 species, with  
402 an estimated weight of 11 tonnes, and 4 large carcharhinids (2 species) were recorded. The most  
403 abundant species for this boat was *R. australiae* with 69 specimens recorded (45.6%) (Fig. 6). Boat  
404 Two was from Pontianak in West Kalimantan (Fig. 1). A total of 111 specimens were recorded from  
405 Boat Two, comprised of 106 medium-large rays from 13 species, with a total estimated weight of 4.8  
406 tonnes, and 5 sharks (4 species). The most abundant species was *M. gerrardi* with 33 individuals  
407 (29.7% of total catch) (Fig. 6). The landed catch of *R. australiae* and *M. gerrardi* appeared to be an  
408 inverse relationship between the Boat One and Boat Two (Fig. 6). Boat Three (which comprised the  
409 catches of two boats landed on the same day) was from Kalimantan (Fig. 1), with a total of 219  
410 specimens were examined, comprised of 211 rays, with and estimated catch weight of 10 tonnes,  
411 and 5 sharks. The most abundant species was *M. gerrardi* with 102 individuals (46.6%).

412

413 **Figure 5.** Overall species composition and percentage (%) of catch of the three Indonesian individual  
414 tangle net boats, of which the catch was fully documented from Muara Angke landing port, Jakarta.  
415 Boat One landed on 7<sup>th</sup> July 2004; Boat Two landed on 16<sup>th</sup> October 2004; Boat Three which landed  
416 the 5<sup>th</sup> October 2005

417

418 **Figure 6.** Variation in the elasmobranch species composition for individual tangle net boat landings  
419 for Boat One (red) landed on 7<sup>th</sup> July 2004, and Boat Two (blue) landed on 16<sup>th</sup> October 2004 from  
420 the Indonesian tangle net fishery from Muara Angke, Jakarta.

421

### 422 **Products from the tangle net fishery**

423 From the informal interviews with the local fishers conducted in the 2001 – 2005 market surveys,  
424 the main products from the tangle net fishery were documented to be fins from shark-like batoids,



425 leather from ray skins, salted meat, and vertebrae. The most important product from the tangle net  
426 fishery are the fins from wedgefishes and giant guitarfishes. During the surveys in 2005, the quoted  
427 price for fins from sawfish, wedgefish and guitarfish were approximately Indonesian rupiah (Rp) 3  
428 million kg<sup>-1</sup> (wet weight, ~US\$202 in 2019 terms). Any fins frozen on board the tangle net boats did  
429 not come through the Muara Angke port, but were subsequently exported internationally to Hong  
430 Kong and Singapore, according to the local fishers.

431 Skins of stingrays, used to produce leather products, comprised the second most important  
432 product in the tangle net fishery (Fig. 2c). The species primarily used were from the genera  
433 *Himantura*, *Maculabatis*, *Pastinachus*, *Pateobatis* and *Urogymnus*, which together comprise a large  
434 component of the landed catch during the market surveys. *Pateobatis jenkinsii* was the most sought  
435 after stingray skin due to the row of enlarged thorns which extend down the midline of the body and  
436 tail. In 2005, the reported value by the local fishers of a 13 cm and 18 cm piece of stingray leather  
437 was Rp 25,000 and 35,000 (US \$1.68 and \$2.36 in 2019 terms), respectively, and approximately  
438 3000–4000 skins were estimated to be exported per month to the Philippines and Japan. Ray meat,  
439 wedgefish in particular, was considered to be superior quality. In 2004, in the Muara Angke  
440 processing village the buying price for wedgefish and guitarfish meat was Rp 4,000–5,000 (US \$0.27–  
441 0.34 in 2019) kg<sup>-1</sup>. For stingrays, meat from the fishers was valued between Rp 2,000–3,500 (US  
442 \$0.13–\$0.24 in 2018) kg<sup>-1</sup>. As the catch was landed in a deteriorated condition, meat from the rays  
443 and sharks is salted and dried. Salted meat was reported to be transported to West Java (Bandung,  
444 Bogor, Garut, Cianjur) and Central Java. Meat from wedgefish was stated to be sold for Rp 10,000–  
445 12,000 (US \$0.67–\$0.81 in 2019 terms) kg<sup>-1</sup> for and for stingray meat Rp 6,000–8,000 (US \$0.40–  
446 \$0.54 in 2019 terms) kg<sup>-1</sup>. The cartilage, such as vertebrae, comprised a small part of the products  
447 from this fishery. In 2004, the fishers received approximately Rp 20,000 (US \$1.35 in 2018) kg<sup>-1</sup> of dry  
448 vertebrae, which were then processed in Jakarta and exported to Korea and Japan.

449

## 450 **Size selectivity of the tangle net fishery compared to other fisheries**

451 The tangle net fishery is highly selective for wedgefish and guitarfish over 130 cm TL and stingrays  
452 over 50 cm DW (Fig. 3) as a result of the mesh size used. The smallest recorded individual caught in  
453 this fishery was a *P. uarnacoides* of 51.7 cm DW and the largest recorded individual was a male  
454 sawfish, estimated to be 420 cm TL. The smaller size classes for many of the species encountered in  
455 the tangle net fishery are also caught as bycatch in numerous other fisheries operating in Indonesian  
456 waters, including the trawls, hand- and long-lines, smaller mesh gillnets, and trammel nets (Fig. 7).  
457 All size classes of *R. australiae* are being caught by Indonesian fisheries; the neonates (~45 cm TL)  
458 are caught as bycatch in small mesh gillnets; sub-adults (~90–130 cm TL) were recorded in the Java

459 Sea trawl fishery; the larger and mature individuals (>170 cm TL) were recorded in hand- and long-  
460 line fisheries (Fig. 7a). Similar trends were seen for a number of dasyatid rays, with other life stages  
461 from neonates to sub-adults are also being caught in other fisheries (Fig. 7b). Catch of *Maculabatis*  
462 *gerrardi* was recorded from small mesh gillnet fishery (~20–70 cm DW), the Java Sea trawl fishery  
463 (~20–100 cm DW), and the trammel net fishery off southern Java (~30–70 cm DW) (Fig. 7b).  
464 *Pastinachus ater* was recorded in the hand- and long-line fisheries (~70–110 cm DW), compared to  
465 typically larger individuals in the tangle net fishery (~80–150 cm DW) (Fig. 7b). *Pateobatis fai* was  
466 recorded in the Java Sea trawl fishery (~60–70 cm DW), in the Arafura Sea trawl fishery (~139–160  
467 cm DW) and hand- and long-line fisheries (~65–160 cm DW) (Fig. 7b). *Pateobatis jenkinsii* also  
468 exposed to fishing throughout all life stages, from small mesh gillnets (~25 – 75cm DW), hand- and  
469 long-line fisheries (~40–100cm DW), as well as the tangle net fishery (~60–140 cm DW) (Fig. 7b).  
470 Catch of *Pateobatis uarnacoides* was recorded in the Java Sea trawl fishery (~30–60 cm DW), and in  
471 the southern Java trammel net fishery (~25–55 cm DW) (Fig. 7b).

472

473 **Figure 7.** Comparison of the size ranges for the (a) *Rhynchobatus australiae* and (b) *Maculabatis*  
474 *gerrardi*, *Pateobatis ater*, *Pateobatis fai*, *Pateobatis jenkinsii*, and *Pateobatis uarnacoides* caught in  
475 the small mesh gillnet (blue), Java Sea trawl fishery (dark green), Arafura Sea trawl fishery (light  
476 green), trammel net (purple), hand- and long-line (yellow) and tangle net (red) in Indonesia.

477

## 478 **Contemporary tangle net fishery: 2005–2014 & 2017–2018**

479 From 2<sup>nd</sup> January 2017 to 16<sup>th</sup> July 2018, a total of 198 boat landings were recorded in the Muara  
480 Angke landing port. Of these landings, there were 14 were from tangle net boat landings and from 7  
481 individual tangle net boats (Table 3). The species are only recorded under single labels in Indonesia  
482 Bahasa of “yong bung/cucut liong bung” [=wedgfish/shark ray], “pari” [=rays], “cucut” [=sharks],  
483 “manyung” [=local catfish species, *Netuma* spp.] and ‘mix/mixed species’. Unknown wedgfish  
484 species comprised a small component of the total landings for these tangle net boats, with an  
485 estimated landed catch of 6 tonnes (Table 3). The majority of catch was recorded as rays with  
486 estimated landed catch of 43.9 tonnes, and unknown shark species were recorded once with 200 kg  
487 (Table 3). The local catfish species (*Netuma* spp.) was recorded from the tangle net landings, with an  
488 estimated catch of 5 tonnes, while unknown ‘mixed species’ accounted for 8 tonnes (Table 3). No

489 **Table 3.** Indonesian Capture Fisheries data on seven vessel landings from the tangle net fishery recorded at Muara Angke port in June 2017 - July 2018. The  
 490 date of landing, vessel name, owner, and fishing gear, with main catch species, and landed catch weight (kilograms, kg) are reported. Dashed lines indicated  
 491 no data was recorded. The species were recorded in Indonesia Bahasa, here they are reported in English with translation from Dharmadi. Source: [50]

| Date of landing | Vessel name           | Owner        | Species 1 | Catch (kg) | Species 2          | Catch (kg) | Species 3          | Catch (kg) | Total  |
|-----------------|-----------------------|--------------|-----------|------------|--------------------|------------|--------------------|------------|--------|
| 4/06/2017       | Surya Cemerlang II    | Darman       | Rays      | 12,000     | --                 | --         | --                 | --         | 12,000 |
| 28/07/2017      | Hasanudin Jaya - 8    | Ong Gikawati | --        | --         | --                 | --         | --                 | --         | --     |
| 13/09/2017      | Hasanudin Jaya        | Ong Gikawati | Rays      | 6,000      | Mixed species      | 2,500      | --                 | --         | 8,500  |
| 3/11/2017       | Bahari Nusantara - XI | Darman       | Rays      | 6,500      | Mixed species      | 3,000      | --                 | --         | 9,500  |
| 24/11/2017      | Kerisi                | Ong Gikawati | Rays      | 3,500      | <i>Netuma spp.</i> | 1,000      | Mixed species      | 2,000      | 6,500  |
| 7/12/2017       | Kerisi                | Ong Gikawati | --        | --         | --                 | --         | --                 | --         | --     |
| 11/01/2018      | Kerisi                | Ong Gikawati | --        | --         | --                 | --         | --                 | --         | --     |
| 29/01/2018      | Hasanudin Jaya        | Ong Gikawati | Rays      | 4,500      | Wedgefish spp 1    | 1,000      | <i>Netuma spp.</i> | 1,000      | 6,500  |
| 13/03/2018      | Bahari Nusantara - XI | Darman       | Rays      | 20,000     | --                 | --         | --                 | --         | 20,000 |
| 20/03/2018      | Kerisi                | Ong Gikawati | Sharks    | 200        | <i>Netuma spp.</i> | 1,000      | Rays               | 3,000      | 4,200  |
| 29/03/2018      | Tri Sanjaya           | Hadi Suriadi | --        | --         | --                 | --         | --                 | --         | --     |
| 6/06/2018       | Surya Cemerlang II    | Darman       | --        | --         | --                 | --         | --                 | --         | --     |
| 26/06/2018      | Kerisi                | Ong Gikawati | Rays      | 5,900      | <i>Netuma spp.</i> | 2,000      | --                 | --         | 7,900  |
| 7/07/2018       | Tri Sanjaya           | Hadi Suriadi | Rays      | 2,503      | Wedgefish spp 2    | 5,000      | --                 | --         | 7,503  |

493 other data on species composition was recorded. The total landings data for wedgefish across all  
494 Indonesian fisheries (including the tangle net fishery, small-mesh gillnet (<20 cm mesh size) fisheries,  
495 Java Sea and Arafura Sea trawl fisheries, southern Java trammel net fishery, and various hand- and  
496 long-line fisheries), declined from 28,492 tonnes in 2005 to 7,483 tonnes in 2014, demonstrating a  
497 73.7% reduced in landed catch (Fig. 8). Wedgefish landings declined by 87.2% between 2005 and  
498 2008 (3,645 tonnes), with landings slightly increased in 2009 and then declined in 2010 (Fig. 8).

499

500 **Figure 8.** Total wedgefish (*Rhynchobatus spp.*) landings (tonnes) from all Indonesian marine fisheries,  
501 including the tangle net fishery, small-mesh gillnet (<20 cm mesh size) fisheries, Java Sea and Arafura  
502 Sea trawl fisheries, southern Java trammel net fishery, and various hand- and long-line fisheries,  
503 from 2005 – 2014. Source: [51]

504

## 505 Discussion

506 This study provides an major increase in our understanding of the data poor tangle net fishery in  
507 Indonesia, providing details on the species and size composition, size selectively of gear used as well  
508 as the other fisheries in the same area, and the consequent declines of shark-like batoids population  
509 in Indonesia. Substantial population declines can be inferred from the declining catch rates of the  
510 target species, *R. australiae*, and the decline in the number of vessels operating in the tangle net  
511 fishery from 500 in 1980's to 7 in 2017/2018, despite continuing high prices for fins and stingray  
512 leather. The reductions in vessels operating in the fishery suggests that populations of the target  
513 species have declined and were unable to economically sustain the level of catches made. Total  
514 wedgefish landings across all Indonesian fisheries drastically declined by almost 90% between 2005  
515 and 2008 and has never recovered to 2005 levels. It must be noted that this data is from the  
516 multiple fisheries from the Indonesian National Fisheries Statistics. It has limited taxonomic detail  
517 and the trends cannot be verified with our tangle net survey results. In November 2015, [52]  
518 recorded 35 specimens without length data of *R. australiae*, 20 *G. thouin* and five *G. typus* from an  
519 unknown fishery, in the Muara Angke port. Despite the drastic declines in wedgefish populations, at  
520 least in part as a result of this targeting fishery, the Muara Angke tangle net fishery was still  
521 operational in July 2018. Wedgefish comprise a small component of the total landings for these  
522 tangle net boats, with the majority of catch beings rays. However, the current information is limited  
523 in taxonomic detail, as the catch is grouped under single labels such as 'rays', 'sharks', 'wedgefish'  
524 and 'mixed'. Thus the species, number caught and size composition information is limited.  
525 Regardless, this demonstrates that wedgefish and giant guitarfish, appear to comprise a small  
526 component of the fisheries catch today in Indonesia, compared to the extensive pre-1980's catches

527 [27]. Increasing fishing pressure on the stingrays may also be resulting in population declines,  
528 however there are insufficient data for stingrays in Indonesia to infer the extent of the declines. The  
529 loss of large, benthic, soft bottom elasmobranchs may have significant ecological consequences,  
530 altering important ecological processes. These rapid declines in wedgfish landings are consistent  
531 with known declines globally [30, 44, 53, 54], and supports the conclusion of ongoing population  
532 depletion for wedgfish species in Indonesia. Despite 80% of the species caught in the fishery being  
533 listed as threatened (Critically Endangered, Endangered, or Vulnerable) on the IUCN Red List of  
534 Threatened Species, the current status of populations and the extent of declines for these rays are  
535 uncertain, as there is no recent species-specific information for this fishery after 2005, requiring  
536 further investigation. Thus it appears that these groups may be facing a widespread conservation  
537 crisis [30].

538 With the declines in wedgfish and giant guitarfish catch, the tangle net fishery now appears to  
539 be reliant largely on the catch of rays for its viability as value for stingray leather has increased over  
540 the past decade. The catch of *R. australiae* appears to have an inverse relationship with *M. gerrardi*,  
541 where in cases when *R. australiae* catch is high, the catch of *M. gerrardi* is low. This difference in  
542 abundance is a probable indication of the declining abundance of *R. australiae* in some areas, in  
543 which case stingrays become the main catch. Both species are common demersal species in the  
544 Indo–West Pacific, and occupy similar habitats and areas of inshore continental shelves waters to at  
545 least 60 m [55, 56]. The time of year may also influence the catch, but more information is required  
546 both on catch composition of this fishery throughout the year. The low number of sharks in the  
547 tangle net fishery was also found in other tangle net fishery surveys [35, 38]. On one occasion, a  
548 smooth hammerhead *Sphyrna zygaena* was recorded from the tangle net fishery in Cirebon [38].  
549 Whale sharks were recorded in 1988 and 2002 [35, 38], but there have been no contemporary  
550 records of *R. typus* caught in tangle net fishery. Non-elasmobranchs have been reported to be  
551 caught in the fishery in low numbers as bycatch or by-products, including green turtle, *Chelonia*  
552 *mydas*, and bony fish such as tuna recorded by the local name “tongkol” (Tribe *Thunnini*) [38] and  
553 sea catfish under the local name “manyung” [= *Netuma* spp]. There is limited information on species  
554 distribution, life history, habitat utilisation, and movement of shark-like batoid and stingrays  
555 worldwide [44]. Research on spatial ecology for wedgfish, guitarfish and stingrays is urgently  
556 required to identify critical areas (nursery or mating areas), seasonality of their habitat use, and  
557 vulnerability of the habitats to anthropogenic impacts [43, 44, 59, 60].

558 Misidentification of species can seriously compromise fisheries and conservation related research  
559 and management initiatives. *Rhynchobatus australiae* is the most commonly caught wedgfish  
560 species in South East Asia [49], yet it commonly confused with other large species, in particular with

561 *Rhynchobatus djiddensis*, *Rhynchobatus laevis* [49] and *R. palpebratus* [28]. *Rhynchobatus*  
562 *palpebratus* does not occur in the Java Sea and other western fishing areas in Indonesia and all  
563 images examined from landings during the market surveys in this study refer to *R. australiae* only.  
564 Misidentification is further compounded by the ambiguity over the ranges of these species and their  
565 occurrence in South East Asian fisheries [49]. For example, the broadnose wedgefish *R. springeri*  
566 overlaps in distribution with *R. australiae* off Java and Sumatra and catches could possibly have  
567 included this species. A single specimen of *R. springeri* was confirmed from the trawl fishery  
568 operating out of Muara Angke [49]. However, the majority of wedgefish recorded from the tangle  
569 net fishery were large females close to 300 cm TL, far larger than the maximum known size of 213  
570 cm TL for *R. springeri* [47]. The other species are rarer in landings and possibly have more of a  
571 restricted and even fragmented spatial distributions [49]. Taxonomic confusion is also apparent with  
572 the giant guitarfish and stingray species in Indonesia and the tangle net fishery. Records of the  
573 sharp-nose guitarfish *Glaucostegus granulatus* from the tangle net fishery operating in the Arafura  
574 Sea in 1987, where it constituted 4.6% of the total landed catch [35], is likely to be a  
575 misidentification of *G. typus*. Prior to 2016, the range for *Glaucostegus granulatus* was poorly  
576 described with no records to suggest that this species occurred in Indonesia, and is now known to  
577 only occur in the northern Indian Ocean between Myanmar and the Persian Gulf [47]. *Aetobatus*  
578 *ocellatus* was previously considered to be conspecific with *A. narinari* and certain colour variations  
579 were previously considered to be a separate species, *A. guttatus*. However, [61] found that *A.*  
580 *narinari* is restricted to the Atlantic Ocean and *A. guttatus* is a junior synonym of *A. ocellatus*. Thus,  
581 only a single species is presently considered to occur in Indonesian waters. As the catch records may  
582 comprise both *M. gerrardi* and *M. macrura*, the numbers presented may be an overestimation of *M.*  
583 *gerrardi* catch. However, our data could not be retrospectively confirmed as either or both species.  
584 Future research on this fishery should aim to investigate whether both species are present in catches  
585 and, if so, in what proportions.

586 Elasmobranch populations can be sustainably fished [62], but this is dependent on the species  
587 biology and fishing pressure, and requires tailored management approaches [63]. In some fisheries  
588 where only adults or juveniles are caught, higher levels of fishing can be sustained [64, 65]. One  
589 approach for sustainable elasmobranch fishing is gauntlet fishing, where the fishery only targets  
590 neonates, juveniles and sub adult classes, and the large adults remain unfished [64, 65]. This could  
591 only be a possible strategy for Indonesia if all fisheries only take juvenile wedgefishes and stingrays.  
592 Yet, all life stages of wedgefish, giant guitarfish, and stingrays from the tangle net fishery are  
593 exposed to overlapping fishing pressure from multiple fisheries in Indonesia. The wedgefish, giant  
594 guitarfish and stingray populations in Indonesia have no respite from fishing pressure to allow for

595 population recovery. The selectivity of large rays and their high economic value has been used as  
596 justification for the continuation of the tangle net fishery [35], without taking into consideration the  
597 impact of other fisheries and the biology of the species. At the time of the landing site surveys a  
598 number of the abundant species, e.g. *R. australiae*, individuals close to the known maximum sizes  
599 were still being observed in the catches (Fig. 3; Fig 4). It therefore can be inferred, that the  
600 populations of wedgefishes, giant guitarfishes, and stingrays are experiencing length selective fishing  
601 mortality. It is expected that the individuals from contemporary populations would be reaching a  
602 smaller maximum size and younger maximum age, than previous generations [66]. The majority of  
603 the *R. australiae*, *M. gerrardi*, and *P. uarnacoides* specimens were large females, with 16 individuals  
604 of *R. australiae* examined internally being pregnant [12]. Female *R. australiae* attain a larger size  
605 than males, and therefore are more likely to be captured in the large-meshed tangle nets [12]. The  
606 removal of large, breeding individuals from the population, causes a reduction in the reproductive  
607 potential of chondrichthyan populations, resulting in rapid declines in the fished populations [64].  
608 Large bodied elasmobranchs typically have low reproductive rates and can only withstand modest to  
609 low levels of fishing mortality [13, 67-69]. Combined with life history information, the magnitude of  
610 Indonesia chondrichthyan catches, and the knowledge of the effects of fisheries on large species  
611 that mainly takes adults [64, 70, 71], it is likely that these populations of rays are experience  
612 unsustainable levels of exploitation and have little potential for recovery without significant  
613 reductions in fishing mortality.

614 Wedgefish and giant guitarfish have a higher than average population productivity compared to  
615 other chondrichthyans, and therefore can potentially recover from population declines more rapidly  
616 than other threatened species [15]. However, this will require significant reductions in fishing  
617 mortality, and in cases where all age/size classes are fished, as in Indonesia, there are considerably  
618 many management and conservation challenges to achieving sustainable outcomes. Wedgefishes  
619 and giant guitarfishes are not managed in Indonesia [72], or through international trade or fishing  
620 restrictions. Given global concerns for this group of species, and the importance of trade in high  
621 value fins and leather, use of international trade regulations such as CITES listing may help to  
622 achieve positive conservation outcomes [3]. *Rhynchobatus australiae* and the common guitarfish,  
623 *Rhinobatos rhinobatos* are listed on the CMS under Appendix II, and *R. australiae*, *Rhynchobatus*  
624 *djiddensis*, *Rhynchobatus laevis*, and *R. rhinobatos* were listed on Annex 1 of the CMS Memorandum  
625 of Understanding (MOU) on the Conservation of Migratory Sharks in 2018 [73]. These listings cover  
626 migratory species that have an unfavourable conservation status, requiring only international  
627 cooperation on their conservation and management, though CMS listing are non-binding, and  
628 Indonesia is not a signatory to the agreement [74]. The families Rhinidae and Glaucostegidae have

629 been proposed for listing on CITES Appendix II [75]. International Agreements such as CITES and CMS  
630 are only one step of many needed to conserve these species. Regional and national fisheries  
631 management strategies are required to address the overfishing of stocks, which will require  
632 reductions in fishing effort. Such measures should be concerned primarily with limiting take,  
633 licencing, gear restrictions, and catch or effort limits. These direct methods can be combined with  
634 indirect methods, such as trade restrictions and developing capacity for species-specific data  
635 collection [3]. In addition, there is a need to include appropriate and economically viable incentives  
636 for livelihood alternatives for fishers, as failure to do so may result in low compliance and illegal  
637 fishing throughout much of their range [31, 76]. However, we also acknowledge that these fisheries  
638 are complex social-ecological systems, and that successful management will require significant  
639 improvements in governance across local, global and regional scales [77]. For tropical and  
640 developing countries, such as Indonesia, species identification is a chronic problem for industrial and  
641 artisanal fisheries [78]. The lack of resources and capacity to collect, analyse and interpret fisheries  
642 data in developing countries such as Indonesia often hinders the development of effective  
643 management strategies and needs to be addressed [79-81]. Lastly, information and research on the  
644 biology, life history and movements of these species are required for assessments of exploited  
645 stocks and of species' vulnerability to fishing pressure. Evidence of substantial and rapid declines in  
646 landings of the target species raises concerns about the status of shark-like batoids in Indonesia.  
647 Management across multiple fisheries and life stages, instead of single fishery management, is  
648 required to ensure the sustainability and conservation of rays, in particular *R. australiae*, which is  
649 caught across a wide range of fisheries at all life stages. The result of this study emphasise the  
650 urgency for effective management for the conservation of these rays.

651

## 652 **Acknowledgements**

653 This work was funded by the Shark Conservation Fund, a philanthropic collaborative pooling  
654 expertise and resources to meet the threats facing the world's sharks and rays (BMD). The Shark  
655 Conservation Fund is a project of Rockefeller Philanthropy Advisors. The landing site surveys  
656 between 2001 and 2005 were funded by the Australian Centre for International Agricultural  
657 Research (ACIAR; grants FIS/2000/062 and FIS/2003/037) and CSIRO Oceans & Atmosphere (WTW).  
658 BMD was supported through an Australian Government Research Training Program Scholarship  
659 (RTPS). The funders had no role in study design, data collection and analysis, decision to publish, or  
660 preparation of the manuscript. The authors would like to thank Ms Stephanie Hernandez for the  
661 design of the map.

662



## 663 **Supporting Information**

664 **SI Table 1.** Dates of the market surveys conducted in the Muara Angke landing port and the  
665 associated village processing area in Jakarta April 2001 – December 2005. The total number of  
666 species and specimens for rays and sharks per survey day are reported.

667

668 **SI Table 1.** Length-weight relationship for the elasmobranch species caught in the Indonesian tangle  
669 net fishery and landed in Muara Angke, Jakarta April 2001 – December 2005.

670

671 **SI Table 2.** Size at maturity (DW/TL cm) for species with length frequency data in the Indonesian  
672 tangle net fishery and landed in Muara Angke, Jakarta April 2001 – December 2005.

673

## 674 **Author Contributions**

675 **Conceptualisation:** William T. White, Brooke M. D’Alberto, Colin A. Simpfendorfer

676 **Data curation:** William T. White

677 **Data analysis:** Brooke M. D’Alberto, William T. White

678 **Funding acquisition:** Brooke M. D’Alberto, William T. White

679 **Investigation:** William T. White, Dharmadi

680 **Methodology:** William T. White

681 **Project administration:** Brooke M. D’Alberto, William T. White

682 **Visualisation:** William T. White, Brooke M. D’Alberto

683 **Writing – original draft:** Brooke M. D’Alberto

684 **Writing – reviewing & editing:** William T. White, Andrew Chin, Dharmadi, Colin A. Simpfendorfer

685

## 686 **Literature cited**

687 1. Stevens JD, Bonfil R, Dulvy NK, Walker PA. The effects of fishing on sharks, rays, and  
688 chimaeras (chondrichthyans), and the implications for marine ecosystems. *ICES Journal of Marine*  
689 *Science*. 2000;57(3):476-94. doi: 10.1006/jmsc.2000.0724.

690 2. Stevens JD, Walker TI, Cook SF, Fordham SV. Threats faced by chondrichthyan fish. In:  
691 Stevens JC, Simpfendorfer CA, Francis MP, editors. *Sharks, rays and chimaeras: the status of the*  
692 *Chondrichthyan fishes : status survey and conservation action plan*. Gland, Switzerland: IUCN SSC  
693 Shark Specialist Group; 2005. p. 48-54.

- 694 3. Blaber SJM, Dichmont CM, White WT, Buckworth R, Sadiyah L, Iskandar B, et al.  
695 Elasmobranchs in southern Indonesian fisheries: the fisheries, the status of the stocks and  
696 management options. *Reviews in Fish Biology and Fisheries*. 2009;19(3):367-91. doi:  
697 10.1007/s11160-009-9110-9.
- 698 4. Clarke SC, McAllister MK, Milner-Gulland EJ, Kirkwood GP, Michielsens CG, Agnew DJ, et al.  
699 Global estimates of shark catches using trade records from commercial markets. *Ecology Letters*.  
700 2006;9(10):1115-26. Epub 2006/09/16. doi: 10.1111/j.1461-0248.2006.00968.x. PubMed PMID:  
701 16972875.
- 702 5. Lack M, Sant G. Trends in global shark catch and recent developments in management.  
703 Cambridge, UK: 2009.
- 704 6. Clarke SC, Milner-Gulland EJ, Bjørndal T. Social, economic, and regulatory drivers of the  
705 shark fin trade. *Marine Resource Economics*. 2007;22(3):305-27.
- 706 7. Fowler SL, Reed TM, Dipper FA. Elasmobranch Biodiversity, Conservation and Management:  
707 Proceedings of the International Seminar and Workshop, Sabah, Malaysia, July 1997. Group ISSS,  
708 editor. Gland, Switzerland and Cambridge, UK: IUCN  
709 2002. 258 p.
- 710 8. Dulvy NK, Fowler SL, Musick JA, Cavanagh RD, Kyne PM, Harrison LR, et al. Extinction risk and  
711 conservation of the world's sharks and rays. *Elife*. 2014;3:e00590. Epub 2014/01/23. doi:  
712 10.7554/eLife.00590. PubMed PMID: 24448405; PubMed Central PMCID: PMC3897121.
- 713 9. Myers RA, Worm B. Extinction, survival or recovery of large predatory fishes. *Philosophical*  
714 *Transactions of the Royal Society of London: B Biological Sciences*. 2005;360(1453):13-20. Epub  
715 2005/02/17. doi: 10.1098/rstb.2004.1573. PubMed PMID: 15713586; PubMed Central PMCID:  
716 PMC1636106.
- 717 10. Ferretti F, Myers RA, Serena F, Lotze HK. Loss of large predatory sharks from the  
718 Mediterranean Sea. *Conservation Biology*. 2008;22(4):952-64. Epub 2008/06/12. doi:  
719 10.1111/j.1523-1739.2008.00938.x. PubMed PMID: 18544092.
- 720 11. Ferretti F, Worm B, Britten GL, Heithaus MR, Lotze HK. Patterns and ecosystem  
721 consequences of shark declines in the ocean. *Ecology Letters*. 2010;13(8):1055-71. Epub  
722 2010/06/10. doi: 10.1111/j.1461-0248.2010.01489.x. PubMed PMID: 20528897.

- 723 12. White WT, Dharmadi. Species and size compositions and reproductive biology of rays  
724 (Chondrichthyes, Batoidea) caught in target and non-target fisheries in eastern Indonesia. *Journal of*  
725 *Fish Biology*. 2007;70(6):1809-37. doi: 10.1111/j.1095-8649.2007.01458.x.
- 726 13. Dulvy NK, Pardo SA, Simpfendorfer CA, Carlson JK. Diagnosing the dangerous demography of  
727 manta rays using life history theory. *PeerJ*. 2014;2:e400. Epub 2014/06/12. doi: 10.7717/peerj.400.
- 728 14. Pardo SA, Kindsvater HK, Cuevas-Zimbron E, Sosa-Nishizaki O, Perez-Jimenez JC, Dulvy NK.  
729 Growth, productivity, and relative extinction risk of a data-sparse devil ray. *Scientific Reports*.  
730 2016;6:33745. Epub 2016/09/24. doi: 10.1038/srep33745. PubMed PMID: 27658342; PubMed  
731 Central PMCID: PMC5034314.
- 732 15. D'Alberto BM, Carlson JK, Pardo SA, Simpfendorfer CA. Population productivity of  
733 wedgefishes, guitarfishes, and banjo rays: inferring the potential for recovery bioRxiv. 2019:Pre-  
734 print. doi: <http://dx.doi.org/10.1101/584557>.
- 735 16. Smith WD, Cailliet GM, Cortés E. Demography and elasticity of the diamond stingray,  
736 *Dasyatis diptera*: parameter uncertainty and resilience to fishing pressure. *Marine and Freshwater*  
737 *Research*. 2008;59(7):575-86. doi: 10.1071/mf07020.
- 738 17. Smith WD, Cailliet GM, Mariano Melendez E. Maturity and growth characteristics of a  
739 commercially exploited stingray, *Dasyatis diptera*. *Marine and Freshwater Research*.  
740 2007;58(1):54–66.
- 741 18. Ebert DA, Gon O. *Rhinobatos austini* n. sp., a new species of guitarfish (Rhinopristiformes:  
742 Rhinobatidae) from the Southwestern Indian Ocean. *Zootaxa*. 2017;4276(2):204-14. Epub  
743 2017/06/15. doi: 10.11646/zootaxa.4276.2.3. PubMed PMID: 28610205.
- 744 19. Last PR, Seret B, Naylor GJ. A new species of guitarfish, *Rhinobatos borneensis* sp. nov. with  
745 a redefinition of the family-level classification in the order Rhinopristiformes (Chondrichthyes:  
746 Batoidea). *Zootaxa*. 2016;4117(4):451-75. Epub 2016/07/11. doi: 10.11646/zootaxa.4117.4.1.  
747 PubMed PMID: 27395187.
- 748 20. Kyne PM, Bennett MB. Diet of the eastern shovelnose ray, *Aptychotrema rostrata* (Shaw &  
749 Nodder, 1794), from Moreton Bay, Queensland, Australia. *Marine and Freshwater Research*.  
750 2002;53(3):679-86.

- 751 21. White J, Simpfendorfer CA, Tobin AJ, Heupel MR. Spatial ecology of shark-like batoids in a  
752 large coastal embayment. *Environmental Biology of Fishes*. 2013;97(7):773-86. doi: 10.1007/s10641-  
753 013-0178-7.
- 754 22. White J, Simpfendorfer CA, Tobin AJ, Heupel MR. Application of baited remote underwater  
755 video surveys to quantify spatial distribution of elasmobranchs at an ecosystem scale. *Journal of*  
756 *Experimental Marine Biology and Ecology*. 2013;448:281-8. doi: 10.1016/j.jembe.2013.08.004.
- 757 23. Harrison LR, Dulvy NK. Sawfish: a global strategy for conservation. Vancouver, Canada: IUCN  
758 Species Survival Commission's Shark Specialist Group; 2014.
- 759 24. Sommerville E, White WT. Elasmobranchs of Tropical Marine Ecosystems. In: Carrier JC,  
760 Musick JA, Heithaus MR, editors. *Sharks and Their Relatives II: Biodiversity, Adaptive Physiology, and*  
761 *Conservation*. Boca Raton: CRC Press; 2010. p. 159-239.
- 762 25. Dulvy NK, Davidson LNK, Kyne PM, Simpfendorfer CA, Harrison LR, Carlson JK, et al. Ghosts  
763 of the coast: global extinction risk and conservation of sawfishes. *Aquatic Conservation: Marine and*  
764 *Freshwater Ecosystems*. 2016;26(1):134-53. doi: 10.1002/aqc.2525.
- 765 26. Compagno LJV, Cook SF. The exploitation and conservation of freshwater elasmobranchs:  
766 status of taxa and prospects for the future. *Journal of Aquaculture and Aquatic Sciences*.  
767 1995;7:62-90.
- 768 27. Keong CH. Indonesia. Selangor, Malaysia TRAFFIC, 1996.
- 769 28. Compagno LJV, Last PR. A new species of wedgfish, *Rhynchobatus palpebratus* sp. nov.  
770 (Rhynchobatoide: Rhynchobatidae), from the Indo–West Pacific. In: Last PR, White WT, Pogonoski JJ,  
771 editors. *Description of new Australian chondrichthyans*. Hobart, Australia: CSIRO; 2008. p. 227-40.
- 772 29. Kyne PM, Jabado RW, Rigby CL, Dharmadi, Gore MA, Pollock CM, et al. The thin edge of the  
773 wedge: extremely high extinction risk in wedgfishes and giant guitarfishes. *bioRxiv PrePrint*. 2019.  
774 doi: <http://dx.doi.org/10.1101/595462>.
- 775 30. Moore ABM. Are guitarfishes the next sawfishes? Extinction risk and an urgent call for  
776 conservation action. *Endangered Species Research*. 2017;34:75-88. doi: 10.3354/esr00830.
- 777 31. Jaiteh VF, Loneragan NR, Warren C. The end of shark finning? Impacts of declining catches  
778 and fin demand on coastal community livelihoods. *Marine Policy*. 2017;82:224-33. doi:  
779 10.1016/j.marpol.2017.03.027.

- 780 32. Dent F, Clarke SC. State of the global market for shark products. Rome, Italy: FAO, 2015  
781 Contract No.: 590.
- 782 33. Karthikeyan R, Babu NC, Mandal A, Sehgal P. Soft leathers from Himantura Stingray skins.  
783 Journal of the Society of Leather Technologists and Chemists. 2009;93(3):108.
- 784 34. Sahubawa L, Pertiwiningrum A, Rahmadian Y. Enhancing the economic value and consumer  
785 preferences of commercial mondol stingray (*Himantura gerardi*) leather creative products. IOP  
786 Conference Series: Earth and Environmental Science. 2018;139. doi: 10.1088/1755-  
787 1315/139/1/012049.
- 788 35. Amir F. Suatu studi tentang pengoperasian shark set bottom gill net di perairan Kepulauan  
789 An, Maluku. Ujung Pandang: Hasanuddin University; 1988.
- 790 36. Suzuki T. Development of shark fisheries and shark fin export in Indonesia: case study of  
791 Karangsong Village, Indramayu, West Java. Sabah, Malaysia: Occasional Paper of the IUCN Species  
792 Survival Commission, 1997.
- 793 37. Tull M. The history of shark fishing in Indonesia. In: Christensen J, Tull M, editors. Historical  
794 Perspectives of Fisheries Exploitation in the Indo-Pacific: Springer; 2014. p. 63-81.
- 795 38. Irawan D. Produktivitas jaring liong bun (gillnet cucut) terhadap ikan depu (*Rhinobatus*  
796 *schlegelii*) dan ikan junjungan (*Rhynchobatus djiddensis*) di perairan utara pulau Jawa [Productivity of  
797 liong bun network (shark gillnet) for *Rhincobatus schlegelii* and *Rhynchobatus djiddensis* in North  
798 Java]. Bogor, Indonesia: Bogor Agricultural University 2002.
- 799 39. Nurdin E, Hufiadi H. Selektivitas alat tangkap ikan pari di perairan laut Jawa. Bawal Widya  
800 Riset Perikanan Tangkap. 2006;1(1):25-30.
- 801 40. Mapeati Y. Studi tentang penangkapan ikan cuct dengan bottom bottom gill net di perairan  
802 Selat Sunda. Ujung Pandang: Hasanuddin University; 1991.
- 803 41. Syah BYNI, Manoppo L, Reppie E. Ketaatan Kapal Penangkap Jaring Insang di Laut Arafura  
804 yang Berpangkalan di Pelabuhan Perikanan Samudera Bitung [Obedience of gill fishing nets in the  
805 Arafura Sea based in the Bitung Ocean Fishing Port]. Jurnal Ilmu dan Teknologi Perikanan Tangkap.  
806 2016;2(4):140-6.
- 807 42. Dharmadi, Kasim K. Keragaan perikanan cucut dan pari di laut Jawa. Jurnal Penelitian  
808 Perikanan Indonesia. 2010;16(3):205-16. doi: <http://dx.doi.org/10.15578/jppi.16.3.2010.205-216>.

- 809 43. Simpfendorfer CA, Heupel MR, White WT, Dulvy NK. The importance of research and public  
810 opinion to conservation management of sharks and rays: a synthesis Marine and Freshwater  
811 Research. 2011;62:518-27. doi: 10.1071/MF11086.
- 812 44. Jabado RW. The fate of the most threatened order of elasmobranchs: Shark-like batoids  
813 (Rhinopristiformes) in the Arabian Sea and adjacent waters. Fisheries Research. 2018;204:448-57.  
814 doi: 10.1016/j.fishres.2018.03.022.
- 815 45. Carpenter KE, Niem VH. FAO species identification guide for fishery purposes. Vol 2:  
816 Cephalopods, crustaceans, holothurians and sharks. Rome: FAO; 1998 1998. 687-1396 p.
- 817 46. Last PR, Stevens JD. Sharks and Rays of Australia. Hobart, TAS: CSIRO 1994.
- 818 47. Last PR, Naylor GJ, Séret B, White W, de Carvalho M, Stehmann M. Rays of the World.  
819 Melbourne, VIC: CSIRO Publishing; 2016.
- 820 48. Last PR, Stevens JD. Sharks and rays of Australia. Second ed. Melbourne, Australia: CSIRO;  
821 2009.
- 822 49. Giles JL, Riginos C, Naylor GJP, Dharmadi, Ovenden JR. Genetic and phenotypic diversity in  
823 the wedgefish *Rhynchobatus australiae*, a threatened ray of high value in the shark fin trade. Marine  
824 Ecology Progress Series. 2016;548:165-80. doi: 10.3354/meps11617.
- 825 50. Research CFF. Muara Angke landing surveys 2017-2018. In: Fisheries DGFC, editor. Jakarta,  
826 Indonesia: Ministry of Marine Affairs and Fisheries; 2018.
- 827 51. Fisheries DGFC. National Fisheries Statistics for whitespotted wedgefish by production in  
828 2005-2014. In: Fisheries DGFC, editor. Jakarta, Indonesia: Ministry of Marine Affairs and Fisheries;  
829 2015.
- 830 52. Wijayanti F, Abrari MP, Fitriana N. Keanekaragaman spesies dan status konservasi ikan pari  
831 di tempat pelelangan ikan Muara Angke Jakarta Utara [Species diversity and conservation status of  
832 stingrays in Muara Angke Fish Auction, North Jakarta]. Jurnal Biodjati. 2018;3(1):23-55.
- 833 53. Diop MS, Dossa J. 30 Years of Shark Fishing in West Africa: . Corlet/Condé-sur-Noireau,  
834 France: Fondation Internationale Du Bassin d'Arguin, 2011 2918445045.
- 835 54. Mohanraj G, Rajapackiam S, Mohan S, Batcha H, Gomathy S. Status of elasmobranchs fishery  
836 in Chennai, India. Asian Fisheries Science. 2009;22(2):607-15.

- 837 55. White WT, Giles J, Dharmadi, Potter IC. Data on the bycatch fishery and reproductive biology  
838 of mobulid rays (Myliobatiformes) in Indonesia. Fisheries Research. 2006;82(1-3):65-73. doi:  
839 10.1016/j.fishres.2006.08.008.
- 840 56. Compagno LJ, Last PR. Order Rhinobatiformes. In: Carpenter KE, Volker HN, editors. The  
841 Living Marine Resources of the Western Central Pacific Volume 3: Batoid fishes, chimaeras and bony  
842 fishes part 1 (Elopidae to Linophrynidae). 3. Rome, Italy: Food and Agriculture Organisation of the  
843 United Nations; 1999. p. 1418-32.
- 844 57. White WT, Last PR, Stevens JD, Yearsley GK, Fahmi, Dharmadi. Economically important  
845 sharks & rays of Indonesia. Canberra: Australian Centre for International Agricultural Research  
846 (ACIAR); 2006.
- 847 58. White WT, Baje L, Sabub B, Appleyard SA, Pogonoski JJ, Mana RR. Smooth hammerhead  
848 shark, *Sphyrna zygaena* (Linnaeus, 1758). In: White WT, Baje L, Sabub B, Appleyard SA, Pogonoski JJ,  
849 Mana RR, editors. Sharks and rays of Papua New Guinea ACIAR Monograph No. 189. Canberra:  
850 Australian Centre for International Agricultural Research; 2017. p. 190-1.
- 851 59. Yates PM, Heupel MR, Tobin AJ, Simpfendorfer CA. Diversity in young shark habitats  
852 provides the potential for portfolio effects. Marine Ecology Progress Series. 2012;458:269-81. doi:  
853 10.3354/meps09759.
- 854 60. White J, Simpfendorfer CA, Tobin AJ, Heupel MR. Age and growth parameters of shark-like  
855 batoids. Journal of Fish Biology. 2014;84(5):1340-53. Epub 2014/04/08. doi: 10.1111/jfb.12359.  
856 PubMed PMID: 24702252.
- 857 61. White WT, Last PR, Naylor GJP, Jensen K, Caira JN. Clarification of *Aetobatus ocellatus* (Kuhl,  
858 1823) as a valid species, and a comparison with *Aetobatus narinari* (Euphrasen, 1790) (Rajiformes:  
859 Myliobatidae). In: Last PR, White WT, Pogonoski JJ, editors. Descriptions of new sharks and rays from  
860 Borneo. 32. Tasmania, Australia: CSIRO Marine and Atmospheric Research; 2010. p. 141-64.
- 861 62. Walker TI. Can shark resources be harvested sustainably? A question revisited with a review  
862 of shark fisheries. Marine and Freshwater research. 1998;49(7):553-72.
- 863 63. Simpfendorfer CA, Dulvy NK. Bright spots of sustainable shark fishing. Curr Biol.  
864 2017;27(3):R97-R8. Epub 2017/02/09. doi: 10.1016/j.cub.2016.12.017. PubMed PMID: 28171764.

- 865 64. Prince JD. Gauntlet Fisheries for Elasmobranchs - the Secret of Sustainable Shark Fisheries.  
866 Journal of Northwest Atlantic Fishery Science. 2005;35:407-16. doi: 10.2960/J.v35.m520.
- 867 65. Simpfendorfer CA, editor Demographic analysis of the dusky shark fishery in southwestern  
868 Australia. American Fisheries Society Symposium; 1999.
- 869 66. Thorson JT, Simpfendorfer CA. Gear selectivity and sample size effects on growth curve  
870 selection in shark age and growth studies. Fisheries Research. 2009;98(1-3):75-84. doi:  
871 10.1016/j.fishres.2009.03.016.
- 872 67. Cortés E. Life History Patterns and Correlations in Sharks. Reviews in Fisheries Science.  
873 2000;8(4):299-344. doi: 10.1080/10408340308951115.
- 874 68. Camhi M, Fowler SL, Musick JA, Brautigam A, Fordham SV. Sharks and their relatives: ecology  
875 and conservation. Occasional Paper of the IUCN Species Survival Commission. 1998;20.
- 876 69. Musick JA. Ecology and Conservation of Long-Lived Marine Animals. American Fisheries  
877 Society Symposium. 1999;23:1-10.
- 878 70. McAuley R, Simpfendorfer CA, Wright IW. Gillnet mesh selectivity of the sandbar shark  
879 (*Carcharhinus plumbeus*): implications for fisheries management. ICES Journal of Marine Science.  
880 2007;64(9):1702-9. doi: <https://doi.org/10.1093/icesjms/fsm136>.
- 881 71. McAuley R, Simpfendorfer CA, Hall NG. A method for evaluating the impacts of fishing  
882 mortality and stochastic influences on the demography of two long-lived shark stocks. ICES Journal  
883 of Marine Science. 2007;64(9):1710-22. doi: 10.1093/icesjms/fsm146.
- 884 72. Dharmadi, Fahmi, Satria F. Fisheries management and conservation of sharks in Indonesia.  
885 African Journal of Marine Science. 2015;37(2):249-58. doi: 10.2989/1814232x.2015.1045431.
- 886 73. CMS. Decisions of the CMS MOU Meeting. Monaco: Memorandum of Understanding on the  
887 Conservation of Migratory Sharks, 2018 14/12/2018. Report No.: CMS/Sharks/MOS3/Decisions.
- 888 74. CMS. Report of the 12th Meeting of the Convention of Parties. Manila, Philippines:  
889 Convention on Migratory Species (CMS), 2017 28/10/2018. Report No.: UNEP/CMS/COP12/REPORT.
- 890 75. CITES. Geneva, Switzerland: Convention on International Trade in Endangered Species 2019  
891 [cited 2019 16/01/2019]. Proposals for amendment of Appendices I and II]. Available from:  
892 <https://cites.org/eng/cop/18/prop/index.php>.



- 893 76. Crona BI, Van Holt T, Petersson M, Daw TM, Buchary E. Using social–ecological syndromes to  
894 understand impacts of international seafood trade on small-scale fisheries. *Global Environmental*  
895 *Change*. 2015;35:162–75.
- 896 77. Ostrom E, Burger J, Field CB, Norgaard RB, Policansky D. Revisiting the commons: local  
897 lessons, global challenges. *science*. 1999;284(5412):278-82.
- 898 78. Bornatowski H, Braga RR, Vitule JRS. Threats to sharks in a developing country: The need for  
899 effective simple conservation measures. *Natureza & Conservação*. 2014;12(1):11-8. doi:  
900 10.4322/natcon.2014.003.
- 901 79. Jaiteh VF, Hordyk AR, Braccini M, Warren C, Loneragan NR. Shark finning in eastern  
902 Indonesia: assessing the sustainability of a data-poor fishery. *ICES Journal of Marine Science: Journal*  
903 *du Conseil*. 2016. doi: 10.1093/icesjms/fsw170.
- 904 80. Vieira S, Kinch J, White WT, Yaman L. Artisanal shark fishing in the Louisiade Archipelago,  
905 Papua New Guinea: Socio-economic characteristics and management options. *Ocean & Coastal*  
906 *Management*. 2017;137:43-56. doi: 10.1016/j.ocecoaman.2016.12.009.
- 907 81. White J, Heupel MR, Simpfendorfer CA, Tobin AJ. Shark-like batoids in Pacific fisheries:  
908 prevalence and conservation concerns. *Endangered Species Research*. 2013;19(3):277-84. doi:  
909 10.3354/esr00473.
- 910

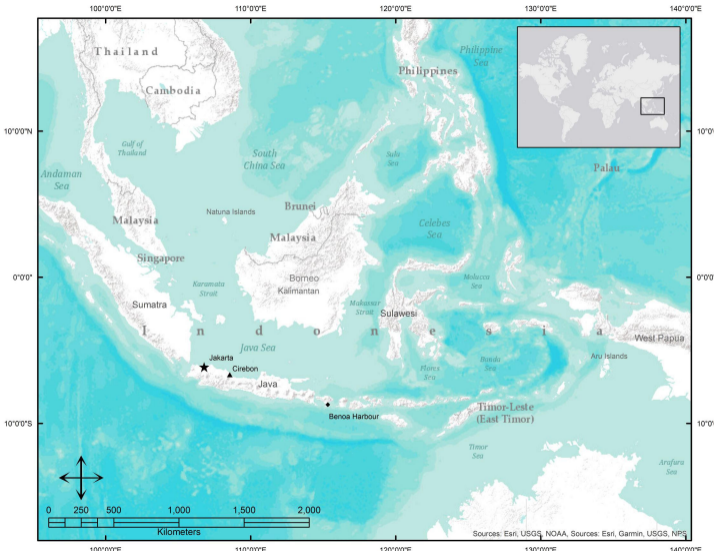

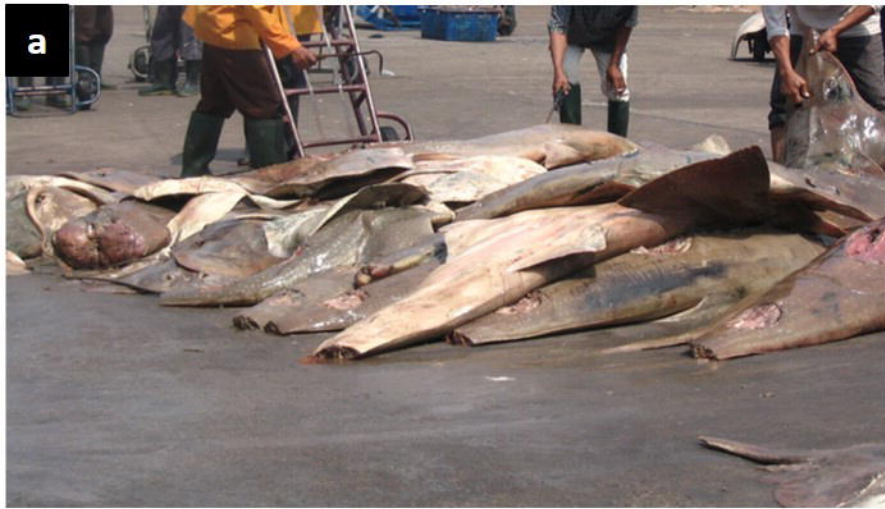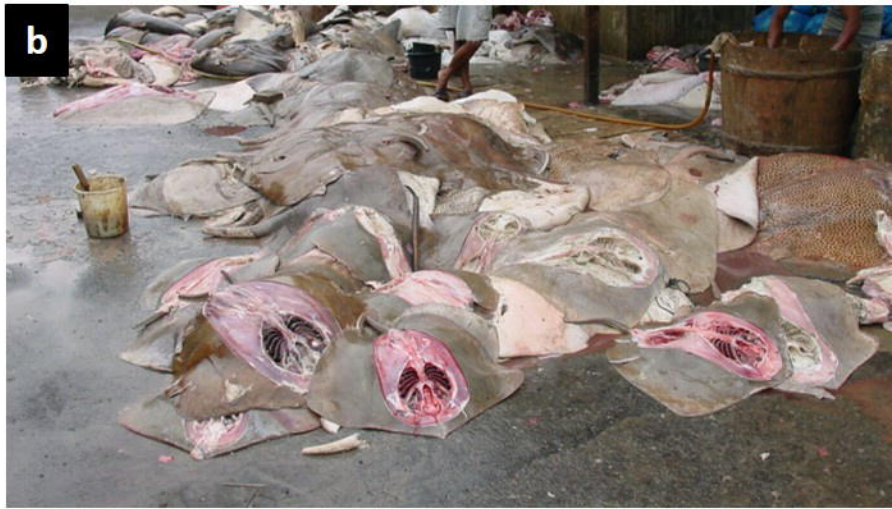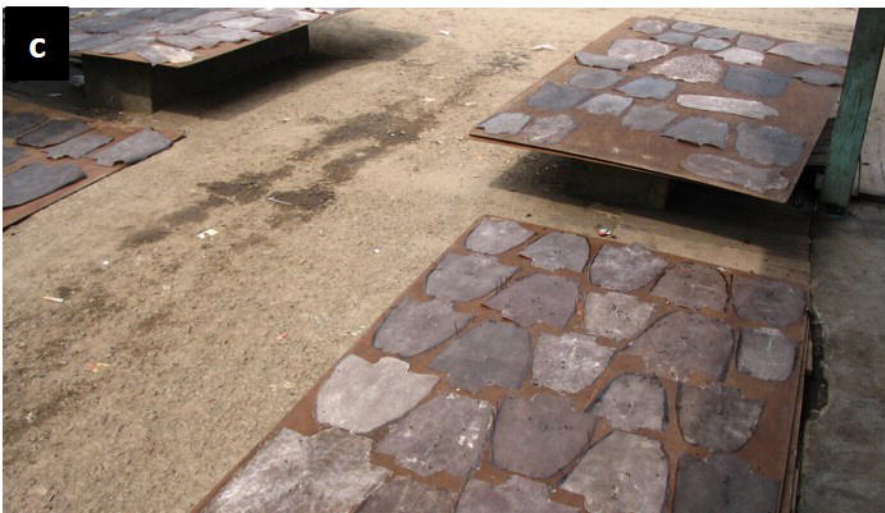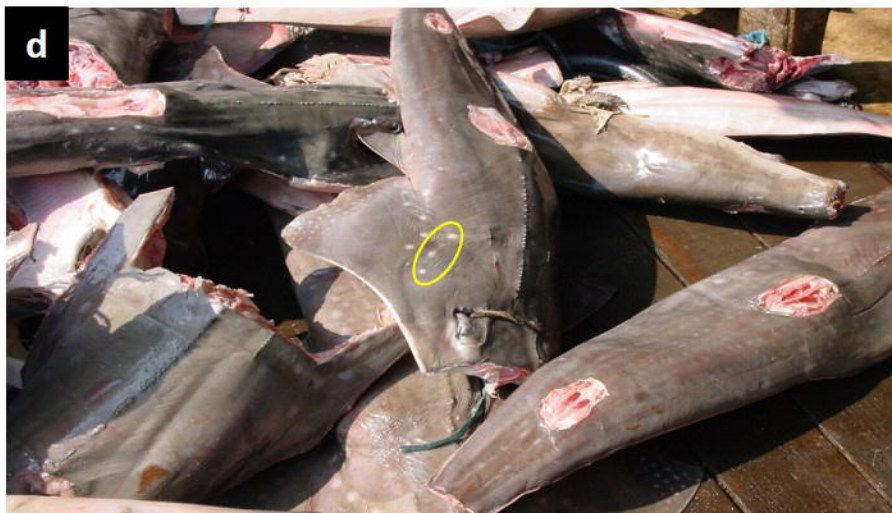

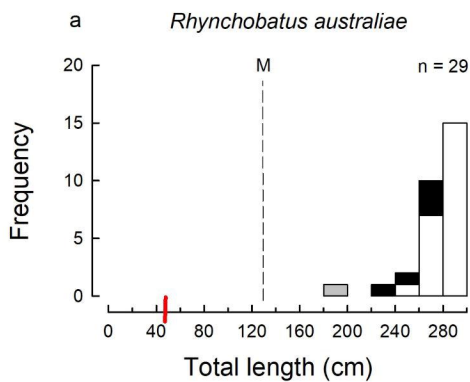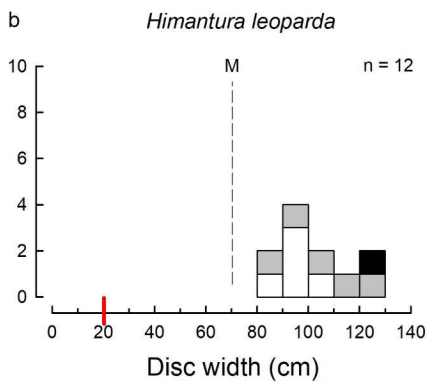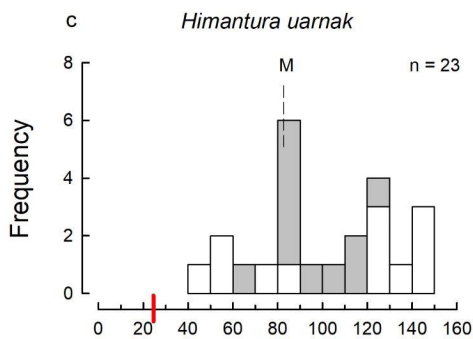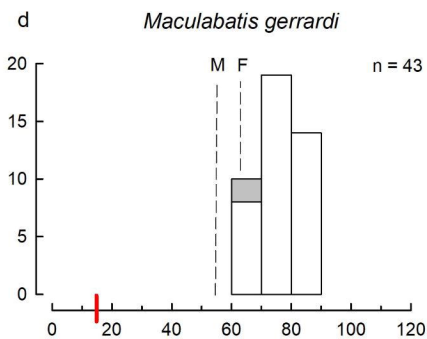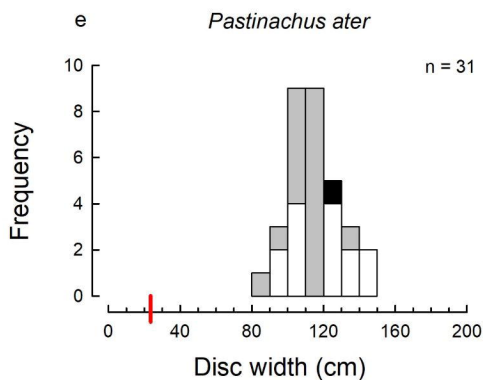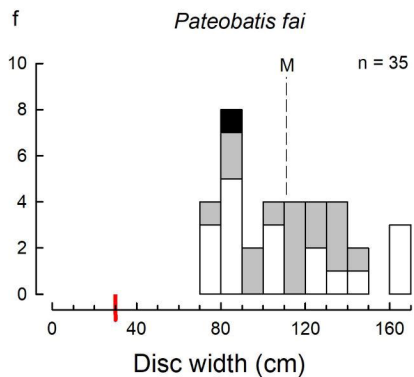

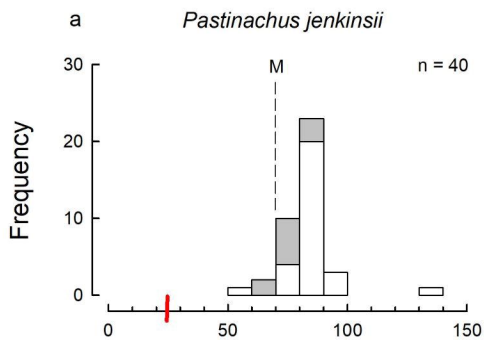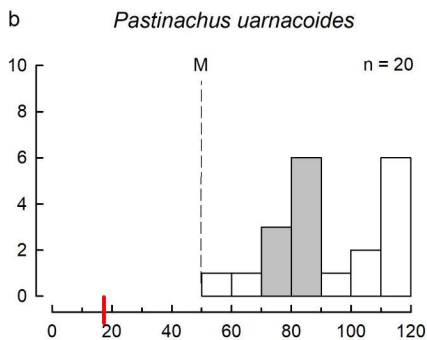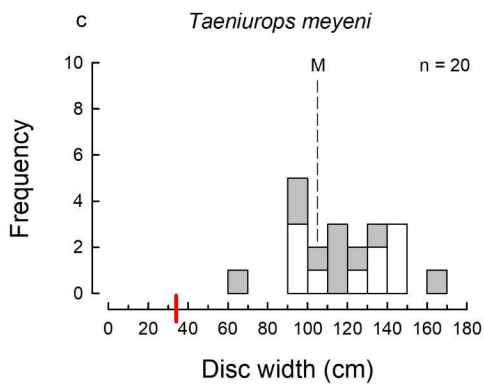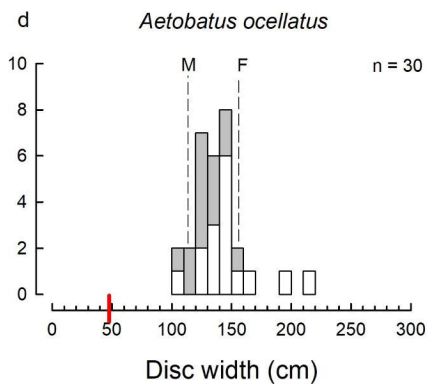

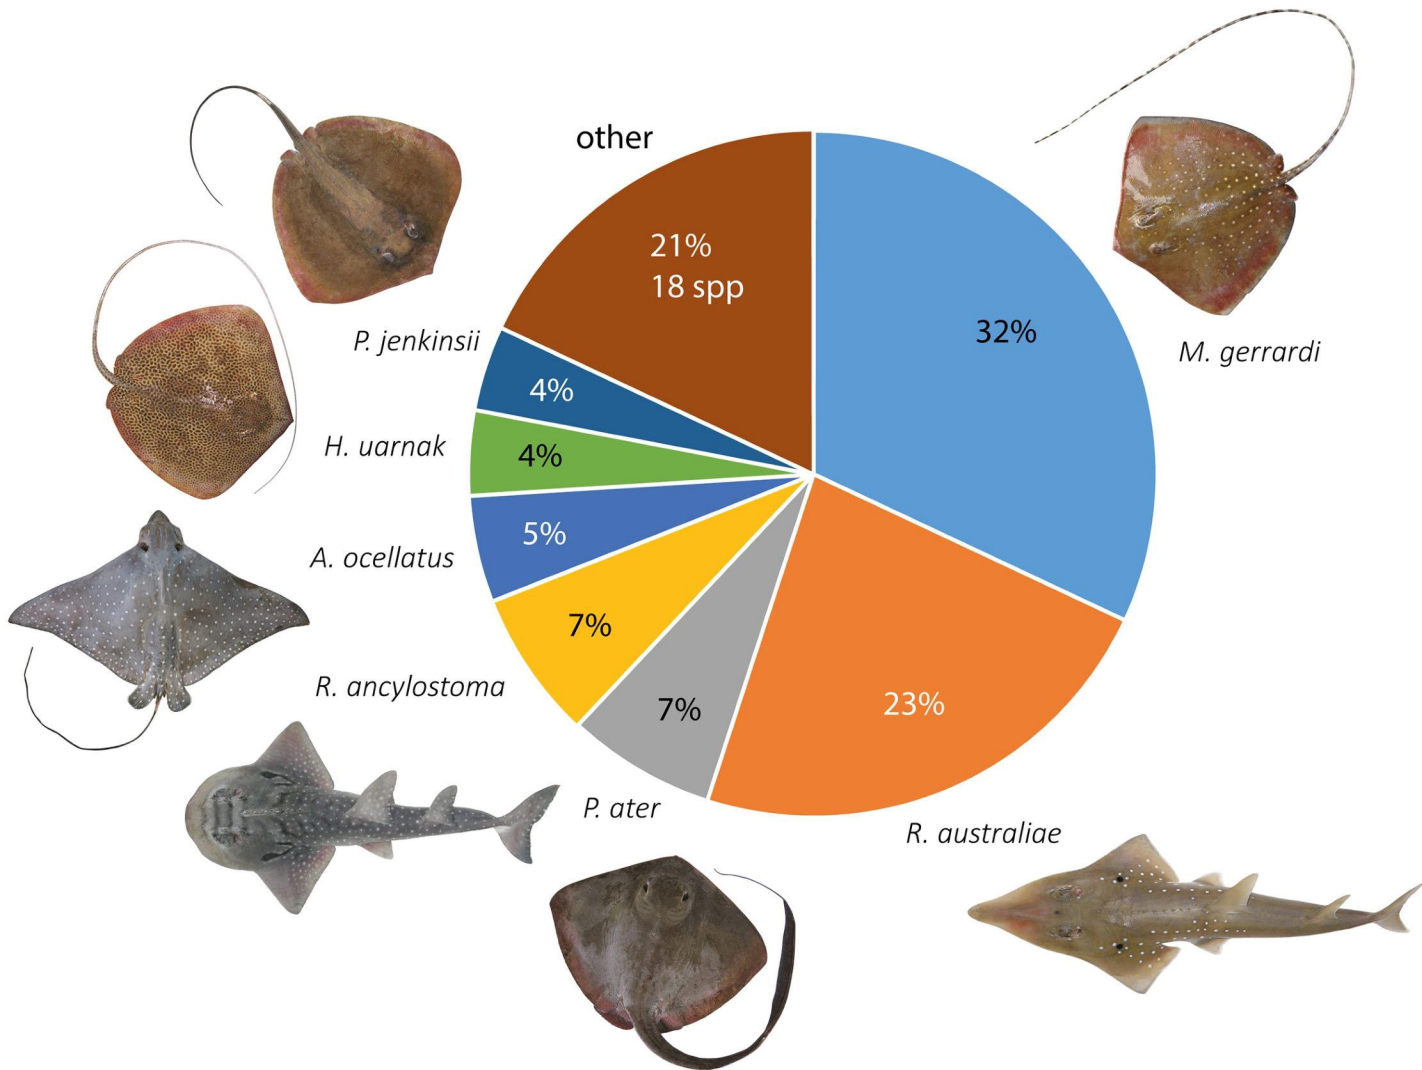

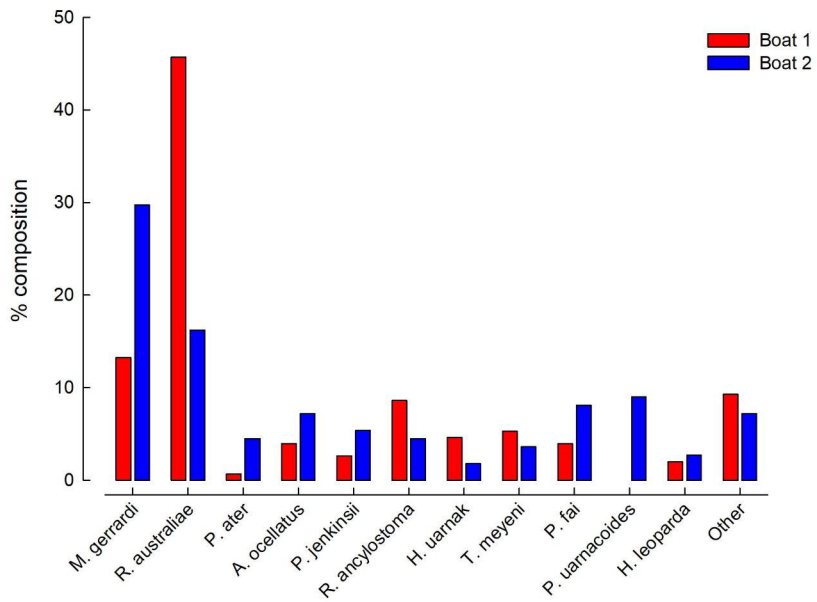

A

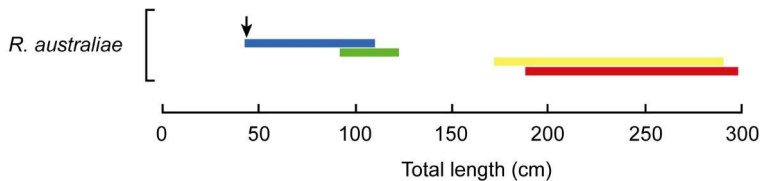

B

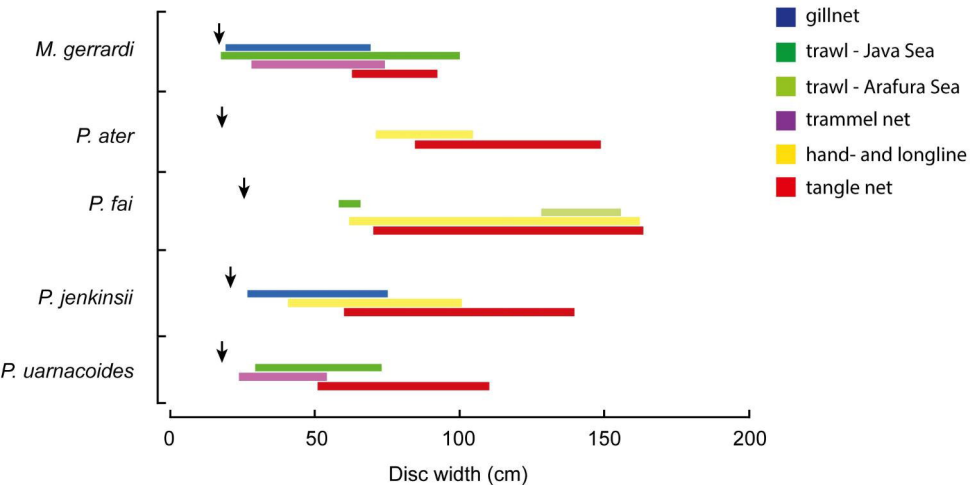



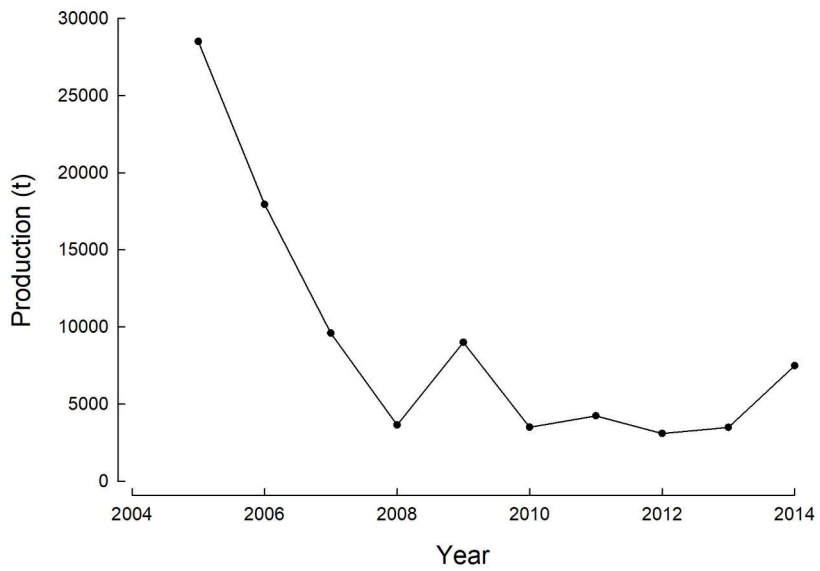

Source: https://www.biorxiv.org/content/10.1101/608935v1.full.pdf
